# Supplementary material for: Genome-wide transcriptome study using deep RNA sequencing for myocardial infarction and coronary artery calcification
Source: PubMed Central journal article supplement (PMC7874462; doi:10.1186/s12920-020-00838-2), 2021-02-10
Supplement: 12920_2020_838_MOESM1_ESM.pdf [file 12920_2020_838_MOESM1_ESM.pdf]

## **SUPPLEMENTARY MATERIAL**

### **Supplementary Figures**

**Supplementary Figure 1.** RNA-Sequencing reads mapping statistics

**Supplementary Figure 2a.** A heatmap of expression profiles of 52 coding genes between blood and Human BodyMap tissues (n=16).

**Supplementary Figure 2b.** A heatmap of expression profiles of 36 lincRNAs between blood and Human BodyMap tissues (n=16).

**Supplementary Figure 3a.** Correlation plot between RNA-Seq and Affymetrix Exon-array platforms for one sample.

**Supplementary Figure 3b.** The histogram distribution of r value for all 193 samples.

**Supplementary Figure 4.** GSEA results for the gene set named "LIANG\_SILENCED\_BY\_METHYLATION\_2" (Nominal p-value = 0, and FDR q-value = 0.02) in which 17 genes silenced by methylation.

**Supplementary Figure 5.** The Pearson correlation of t values comparing cases of MI (i.e., Case 1) with controls for 10,595 expressed genes found in both platforms

### **Supplementary Tables**

**Supplementary Table 1.** RNA quality of the studied samples across three groups

**Supplementary Table 2.** Nine samples sequenced twice

**Supplementary Table 3.** Protein-coding genes were highly expressed in whole blood (435 genes with  $\log_2(\text{FPKM}) > 4$  in all samples)

**Supplementary Table 4.** GO analysis of 435 protein-coding genes

**Supplementary Table 5.** LincRNAs highly expressed in whole blood (36 lincRNAs with  $\log_2(\text{FPKM}) > 1$  in all samples)

**Supplementary Table 6.** Results of adjusting for additional 9 clinical covariates for 68 coding gene and 2 lincRNA signatures identified by Model 1.

**Supplementary Table 7.** GSEA pathway analysis and leading-edge genes (FDR<0.25 including 215 gene sets are upregulated in phenotype MI, and 8 gene sets are upregulated in controls)

**Supplementary Table 8.** 35 leading edge genes among the gene set of 72 genes on Affymetrix Exon-array data

### **Supplementary Methods**

#### **Rotterdam RNA-Seq cohort includes sample size, RNA library preparation, sequencing, and data processing and data analysis**

Rotterdam Study RNA-Seq data was generated as part of the BIOS project and is described in detail elsewhere<sup>1</sup>. In short, Total RNA was globin cleared using Ambion GLOBINclear and sequenced to a minimum yield of 15M paired-end reads on an HiSeq 2000. Data was aligned to reference genome hg19 using STAR, followed by quantification of all GENCODE genes using custom scripts. We then extracted the counts of 56,515 transcripts for 807 participants of the Rotterdam Study (RS-I, II and III). Using edgeR, CPM values were generated for each sample, and transcripts with CPM<1 in more than 90% of samples were excluded, allowing 15,331 transcripts in further analysis.

For each coded phenotype, linear regression analysis was performed in R, correcting for age, gender, flowcell and the number of sequenced reads. A custom linear regression

script was used as the dataset was too large to be processed by edgeR or DEseq. The effect sizes and uncorrected p-values were reported for each of the candidate genes of the discovery analysis.

### **Rotterdam Study CAC data**

The Rotterdam Study is a population-based cohort study that started in 1990 (PMID: 26386597). All inhabitants aged 55 years and older, living in a suburb of Rotterdam were invited and 7983 agreed to participate (78%). This group is referred to as Rotterdam Study cohort I (RS-I). In 2000, a second study cohort was introduced (RS-II) comprising 3011 persons.

CAC was measured in the epicardial coronary arteries using an EBCT with a C-150 Imatron scanner (GE-Imatron, San Francisco, California) in the third visit of the original cohort (RS-I) and the first visit of the extended cohort (RS-II) (PMID: 20946998). Participants exercised adequate breath-holding before the scan. Thirty-eight images were obtained from the level of the root of the aorta through the heart with 100-ms scan time and 3-mm slice thickness. Images were acquired at 80% of the cardiac cycle, using electrocardiogram triggering, during a single breath-hold. Quantification of CAC was performed with Acculmage software (Acculmage Diagnostics Corporation), displaying all pixels with a density above 130 Hounsfield Units (HU). A calcification was defined as a minimum of 2 adjacent pixels with a density over 130 HU<sup>2</sup>.

CAC was assessed by a 16-slice or 64-slice MDCT scanners (SOMATOM Sensation 16 or 64, Siemens, Forchheim, Germany) in the fourth visit of the original cohort (RS-I) and the second visit of the extended cohort (RS-II)<sup>3</sup>. The cardiac scan

reached from the apex of the heart to the tracheal bifurcation. Atherosclerotic calcification was identified based on a threshold of 130 HU, using dedicated software (Syngo Calcium Scoring, Siemens, Forcheim, Germany). Calcification was quantified with the Agatston score using dedicated software (syngo Calcium Scoring, Siemens, Forcheim, Germany). The total score per vascular bed was calculated by adding the scores of all lesions in that bed<sup>3</sup>.

## **References**

1. Zhernakova, D.V. *et al.* Identification of context-dependent expression quantitative trait loci in whole blood. *Nat Genet* **49**, 139-145 (2017).
2. Elias-Smale, S.E. *et al.* Coronary calcium score improves classification of coronary heart disease risk in the elderly: the Rotterdam study. *J Am Coll Cardiol* **56**, 1407-14 (2010).
3. Elias-Smale, S.E. *et al.* Burden of atherosclerosis improves the prediction of coronary heart disease but not cerebrovascular events: the Rotterdam Study. *Eur Heart J* **32**, 2050-8 (2011).

Supplemental Figure 1. RNA-Sequencing reads mapping statistics

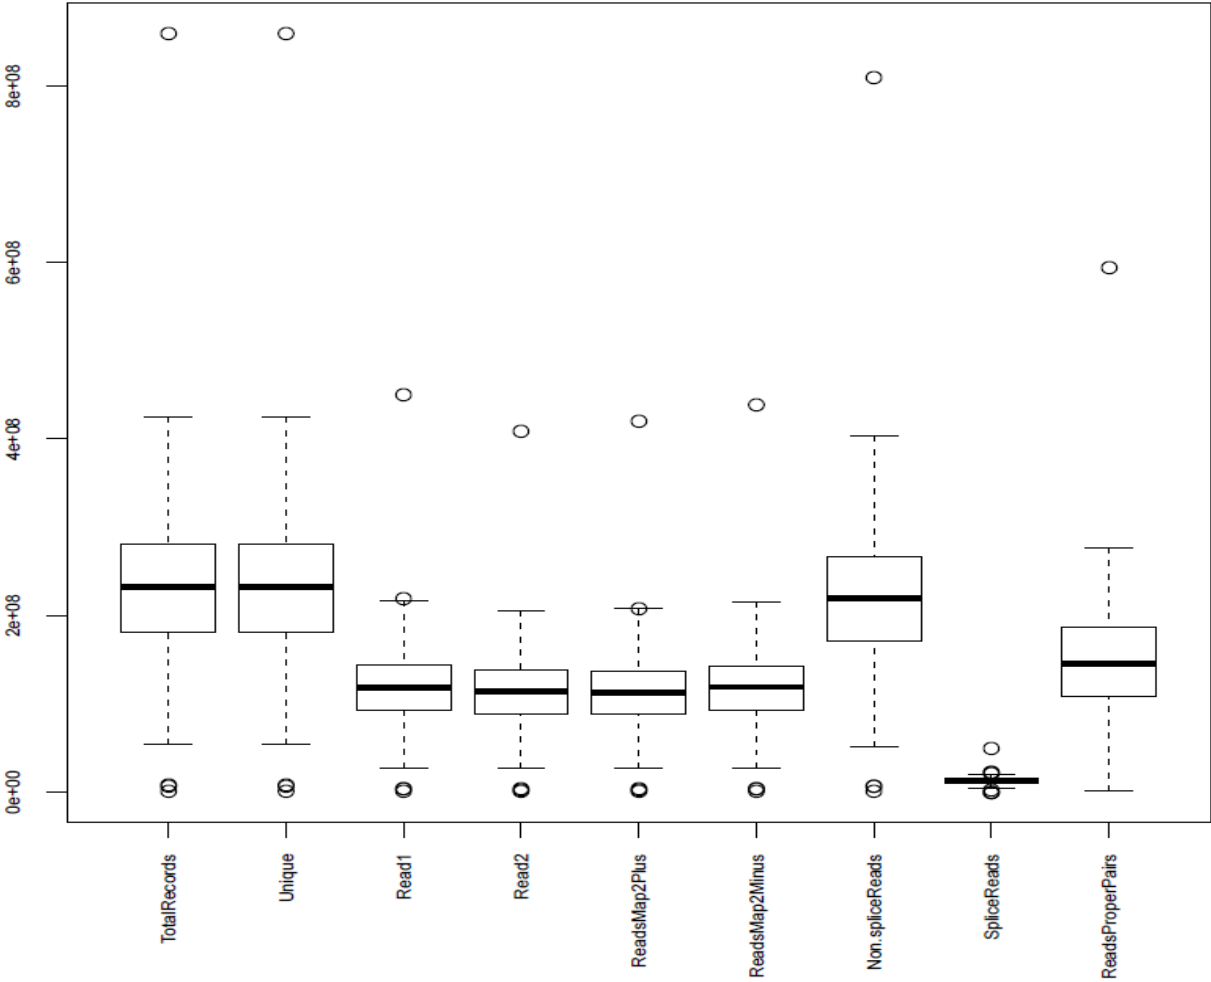

**Supplemental Figure 2a.** A heatmap of expression profiles of 52 coding genes between blood and Human BodyMap tissues (n=16). Half of the coding genes are expressed higher in blood than in 16 other tissues in BodyMap RNA-seq data (top and middle panels).

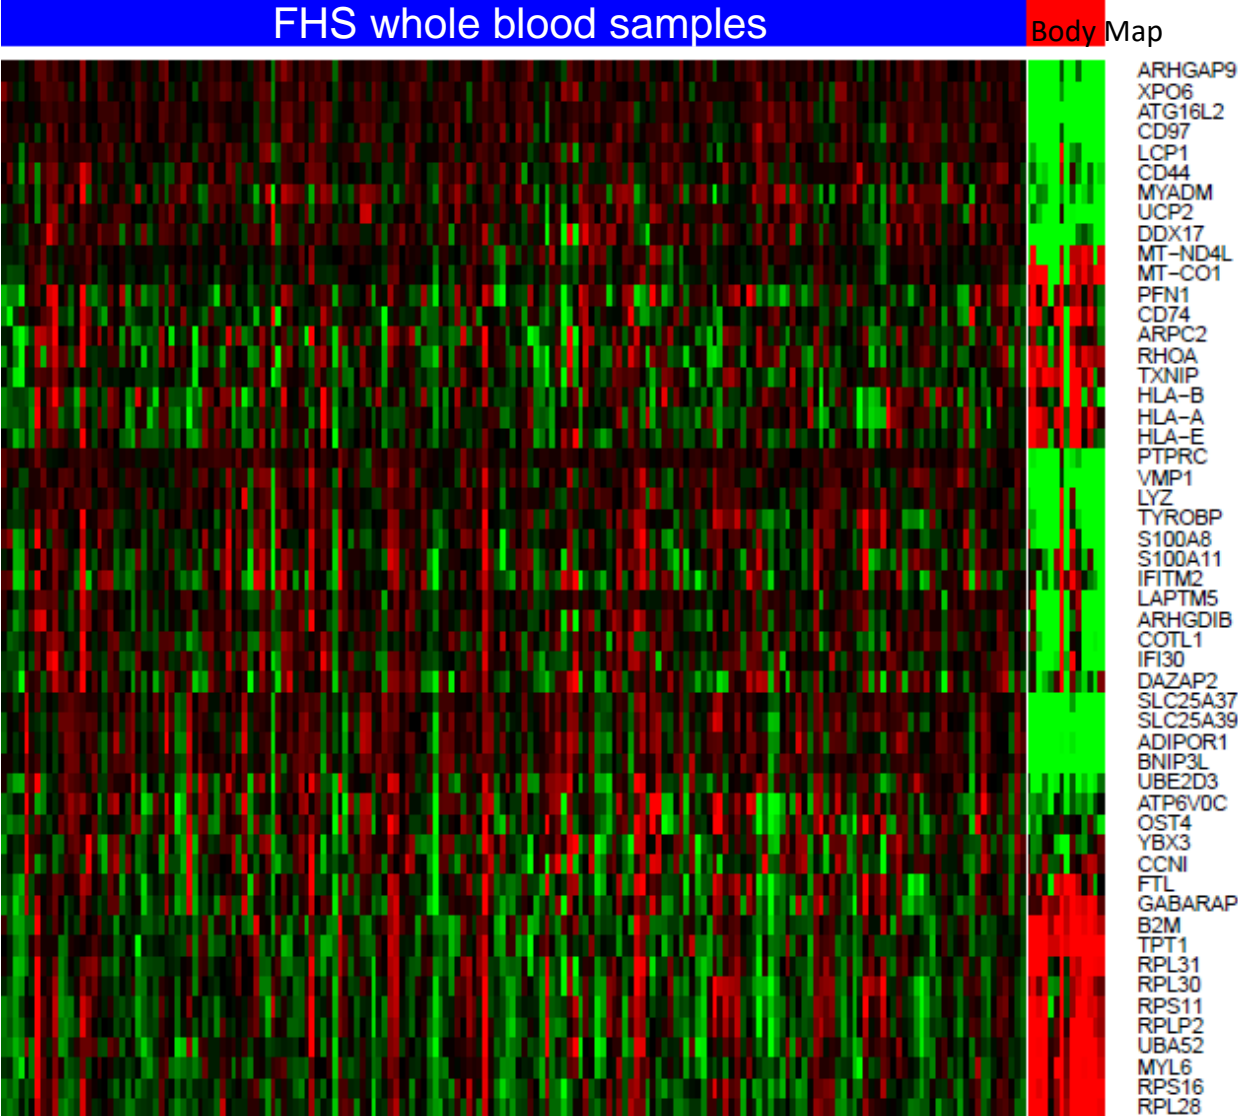

**Supplemental Figure 2b.** A heatmap of expression profiles of 36 lincRNAs between blood and Human BodyMap tissues (n=16). The majority of lincRNAs (26/36=72%) were expressed higher in blood than in 16 other tissues in the BodyMap RNA-seq data (top panel).

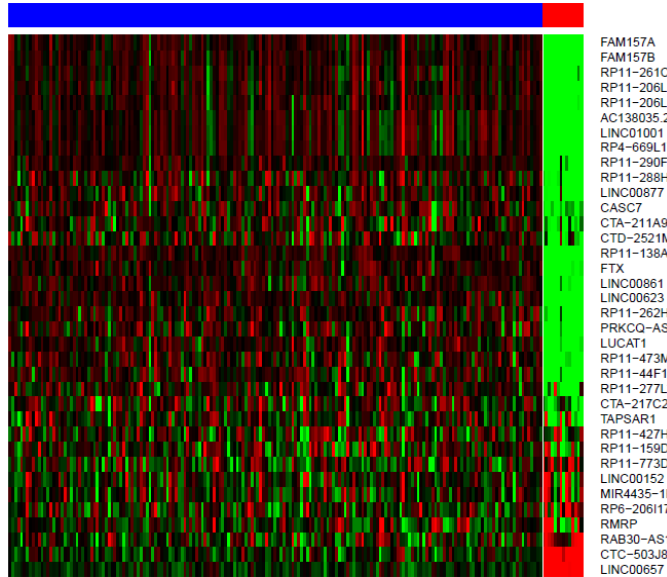

**Supplemental Figure 3a.** Correlation plot between RNA-Seq and Affymetrix Exon-array platforms for one sample.

**RNA-Seq vs. Exon-array for one sample (N = 17,859 genes)**

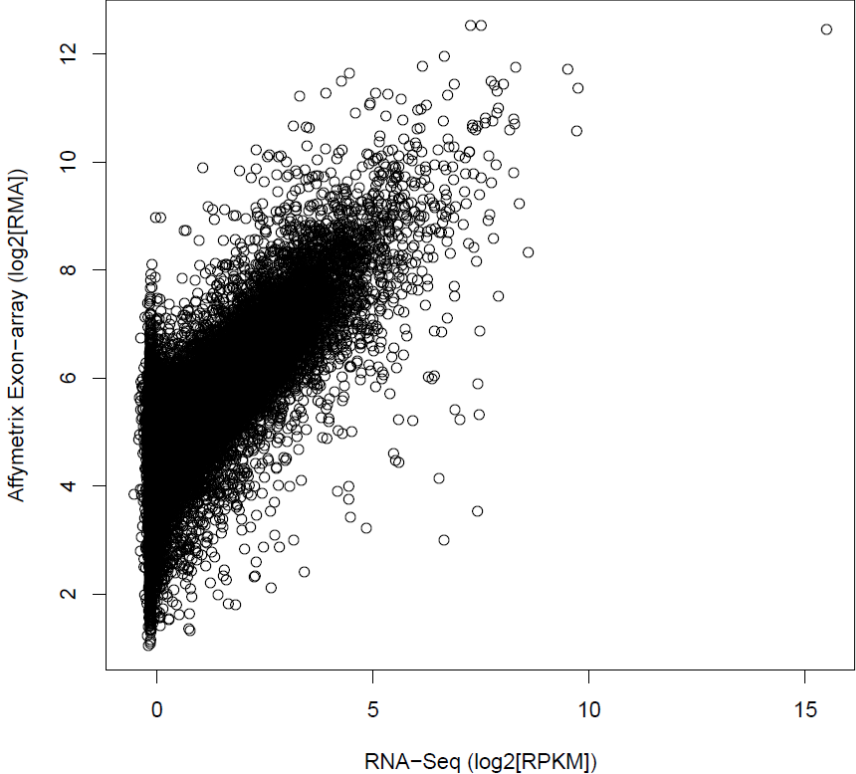



**Supplemental Figure 3b.** The histogram distribution of r value for all 193 samples.  
Pearson correlation between RNA-Seq and Exon-array

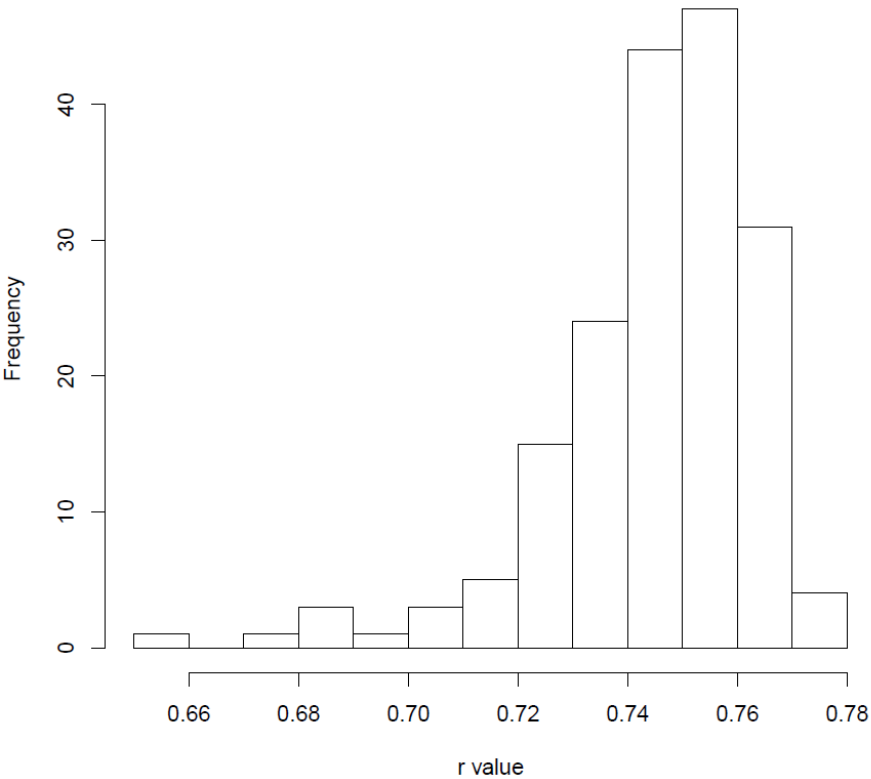

**Supplemental Figure 4.** GSEA results for the gene set named “LIANG\_SILENCED\_BY\_METHYLATION\_2” (Nominal p-value = 0, and FDR q-value = 0.02) in which 17 genes silenced by methylation.

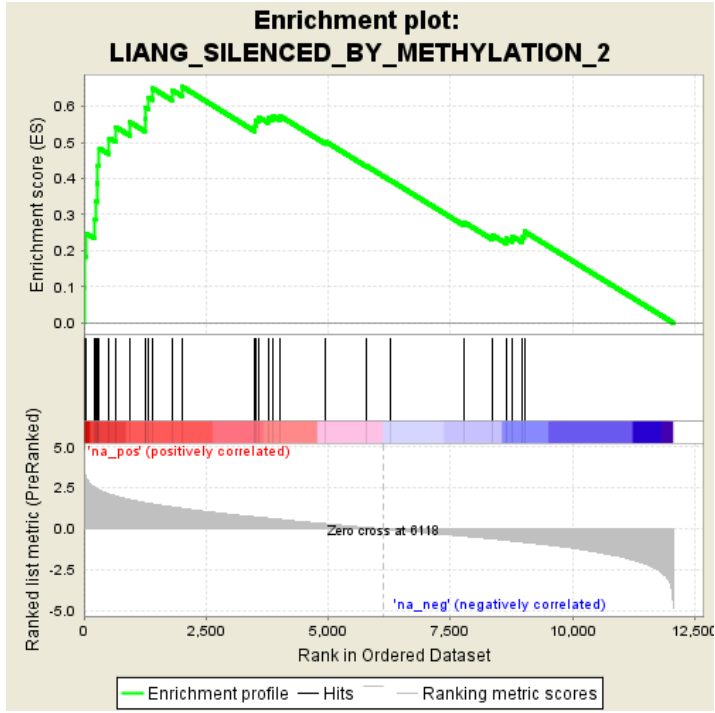

|    | PROBE   | GENE SYMBOL                                                | GENE TITLE                                                                         | RANK IN GENE LIST | RANK METRIC SCORE | RUNNING ES | CORE ENRICHMENT |
|----|---------|------------------------------------------------------------|------------------------------------------------------------------------------------|-------------------|-------------------|------------|-----------------|
| 1  | IRF7    | IRF7<br><a href="#">Entrez</a> , <a href="#">Source</a>    | interferon regulatory factor 7                                                     | 1                 | 4.708             | 0.0990     | Yes             |
| 2  | IFI6    | IFI6<br><a href="#">Entrez</a> , <a href="#">Source</a>    | interferon, alpha-inducible protein 6                                              | 3                 | 4.132             | 0.1859     | Yes             |
| 3  | IFIT1   | IFIT1<br><a href="#">Entrez</a> , <a href="#">Source</a>   | interferon-induced protein with tetratricopeptide repeats 1                        | 55                | 3.082             | 0.2466     | Yes             |
| 4  | SLPI    | SLPI<br><a href="#">Entrez</a> , <a href="#">Source</a>    | secretory leukocyte peptidase inhibitor                                            | 209               | 2.542             | 0.2874     | Yes             |
| 5  | IFI44   | IFI44<br><a href="#">Entrez</a> , <a href="#">Source</a>   | interferon-induced protein 44                                                      | 239               | 2.489             | 0.3374     | Yes             |
| 6  | S100A4  | S100A4<br><a href="#">Entrez</a> , <a href="#">Source</a>  | S100 calcium binding protein A4                                                    | 270               | 2.444             | 0.3863     | Yes             |
| 7  | MX1     | MX1<br><a href="#">Entrez</a> , <a href="#">Source</a>     | myxovirus (influenza virus) resistance 1, interferon-inducible protein p78 (mouse) | 283               | 2.415             | 0.4362     | Yes             |
| 8  | IFI44L  | IFI44L<br><a href="#">Entrez</a> , <a href="#">Source</a>  | interferon-induced protein 44-like                                                 | 316               | 2.368             | 0.4834     | Yes             |
| 9  | MX2     | MX2<br><a href="#">Entrez</a> , <a href="#">Source</a>     | myxovirus (influenza virus) resistance 2 (mouse)                                   | 517               | 2.125             | 0.5115     | Yes             |
| 10 | PI3     | PI3<br><a href="#">Entrez</a> , <a href="#">Source</a>     | peptidase inhibitor 3, skin-derived (SKALP)                                        | 651               | 2.002             | 0.5425     | Yes             |
| 11 | XAF1    |                                                            |                                                                                    | 946               | 1.780             | 0.5556     | Yes             |
| 12 | OAS1    | OAS1<br><a href="#">Entrez</a> , <a href="#">Source</a>    | 2'-5'-oligoadenylate synthetase 1, 40/46kDa                                        | 1247              | 1.600             | 0.5643     | Yes             |
| 13 | ICAM1   | ICAM1<br><a href="#">Entrez</a> , <a href="#">Source</a>   | intercellular adhesion molecule 1 (CD54), human rhinovirus receptor                | 1261              | 1.591             | 0.5967     | Yes             |
| 14 | TNFAIP3 | TNFAIP3<br><a href="#">Entrez</a> , <a href="#">Source</a> | tumor necrosis factor, alpha-induced protein 3                                     | 1325              | 1.563             | 0.6244     | Yes             |
| 15 | IFIT3   | IFIT3<br><a href="#">Entrez</a> , <a href="#">Source</a>   | interferon-induced protein with tetratricopeptide repeats 3                        | 1408              | 1.522             | 0.6496     | Yes             |
| 16 | OAS2    | OAS2<br><a href="#">Entrez</a> , <a href="#">Source</a>    | 2'-5'-oligoadenylate synthetase 2, 69/71kDa                                        | 1805              | 1.337             | 0.6448     | Yes             |
| 17 | THBD    | THBD<br><a href="#">Entrez</a> , <a href="#">Source</a>    | thrombomodulin                                                                     | 2004              | 1.255             | 0.6548     | Yes             |

**Supplemental Figure 5.** The Pearson correlation of t values comparing cases of MI (i.e., Case 1) with controls for 10,595 expressed genes found in both platforms; the overall correlation between RNA-Seq and exon array is modest but significant ( $r = 0.21$ ,  $P < 1e-324$ ).

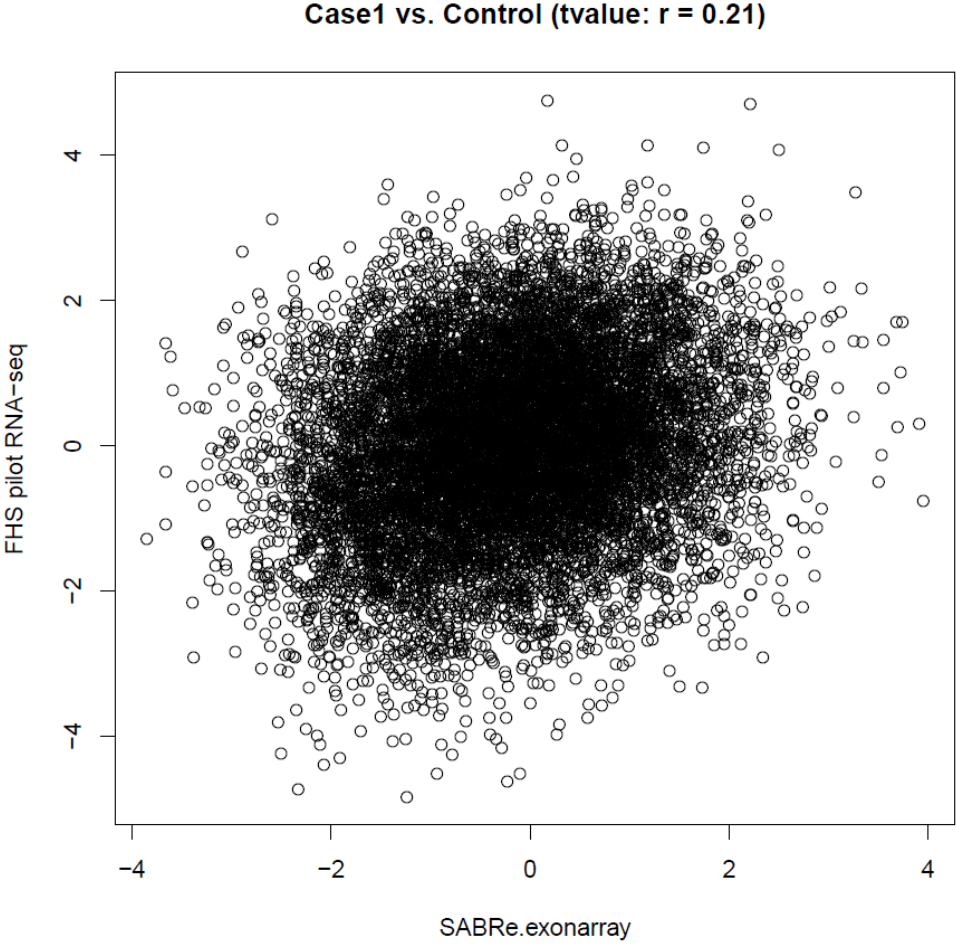

**Supplemental Table 1. RNA quality of the studied samples across three groups.**

| <b>N=198</b>                 | <b>Early MI<br/>(n=55)</b> | <b>High CAC w/o MI<br/>(n=72)</b> | <b>Controls<br/>(n=71)</b> | <b>P-<br/>value</b> |
|------------------------------|----------------------------|-----------------------------------|----------------------------|---------------------|
| <b>RNAQualityScore (RIN)</b> | 6.84 ± 2.02                | 6.74 ± 1.94                       | 7 ± 1.41                   | 0.68                |
| <b>Concentration (ng/ul)</b> | 105.30 ± 81.08             | 134.1 ± 64.83                     | 142.20 ± 92.15             | 0.03                |
| <b>Yield (ug)</b>            | 4.21 ± 3.24                | 5.37 ± 2.59                       | 5.69 ± 3.69                | 0.03                |
| <b>X260_280</b>              | 1.54 ± 1.19                | 1.72 ± 0.27                       | 1.73 ± 0.30                | 0.23                |

**Supplemental Table 2. Samples sequenced twice (N=9)**

| <b>Sample_Id</b> | <b>Reads</b> | <b>Mapped</b> | <b>Mapping<br/>rate</b> | <b>Aligned<br/>pairs</b> | <b>Concordant<br/>pair alignment<br/>rate</b> | <b>Correlation<br/>between samples<br/>sequenced twice</b> |                |
|------------------|--------------|---------------|-------------------------|--------------------------|-----------------------------------------------|------------------------------------------------------------|----------------|
|                  |              |               |                         |                          |                                               | <b>logCPM</b>                                              | <b>logFPKM</b> |
| FHSB13_8         | 147,401,552  | 50,019,054    | 0.329                   | 40,719,199               | 0.25                                          | <b>0.77</b>                                                | 0.71           |
| FHSB4_3          | 186,590,516  | 103,101,639   | 0.537                   | 74,735,840               | 0.361                                         | <b>0.91</b>                                                | 0.83           |
| FHSB2_12         | 110,841,030  | 72,439,633    | 0.65                    | 55,436,065               | 0.441                                         | <b>0.99</b>                                                | 0.91           |
| FHSB2_13         | 100,667,196  | 71,720,890    | 0.708                   | 56,555,404               | 0.49                                          | <b>0.95</b>                                                | 0.84           |
| FHSB2_10         | 83,276,638   | 62,516,446    | 0.746                   | 50,352,216               | 0.535                                         | <b>0.98</b>                                                | 0.87           |
| FHSB10_15        | 71,363,082   | 60,014,886    | 0.831                   | 51,534,020               | 0.654                                         | <b>0.93</b>                                                | 0.83           |
| FHSB1_4          | 166,226,536  | 850,905       | 0.005                   | 601,967                  | 0.003                                         | <b>0.81</b>                                                | 0.75           |
| FHSB4_4          | 200,911,973  | 3,484,644     | 0.017                   | 2,788,914                | 0.013                                         | <b>0.78</b>                                                | 0.65           |
| FHSB4_9          | 137,614,821  | 3,970,270     | 0.028                   | 3,225,507                | 0.021                                         | <b>0.91</b>                                                | 0.77           |

**Supplemental Table 3. Protein-coding genes were highly expressed in whole blood (435 genes with log2 (FPKM) > 4 in all samples)**

| <b>gene_id</b>  | <b>gene_short_name</b> | <b>locus</b>          | <b>gene_biotype</b> |
|-----------------|------------------------|-----------------------|---------------------|
| ENSG00000000938 | FGR                    | 1:27938574-27961788   | protein_coding      |
| ENSG00000002834 | LASP1                  | 17:37026111-37078023  | protein_coding      |
| ENSG00000003402 | CFLAR                  | 2:201980826-202041410 | protein_coding      |
| ENSG00000003756 | RBM5                   | 3:50126340-50156454   | protein_coding      |
| ENSG00000005483 | KMT2E                  | 7:104654625-104754808 | protein_coding      |
| ENSG00000005844 | ITGAL                  | 16:30483978-30534506  | protein_coding      |
| ENSG00000008988 | RPS20                  | 8:56979853-56987069   | protein_coding      |
| ENSG00000010244 | ZNF207                 | 17:30677135-30708905  | protein_coding      |
| ENSG00000010404 | IDS                    | X:148558520-148602635 | protein_coding      |
| ENSG00000011600 | TYROBP                 | 19:36395302-36399197  | protein_coding      |
| ENSG00000012779 | ALOX5                  | 10:45869660-45941561  | protein_coding      |
| ENSG00000013306 | SLC25A39               | 17:42396992-42402238  | protein_coding      |
| ENSG00000015285 | WAS                    | X:48534984-48549818   | protein_coding      |
| ENSG00000018280 | SLC11A1                | 2:219246751-219261617 | protein_coding      |
| ENSG00000019582 | CD74                   | 5:149781199-149792492 | protein_coding      |
| ENSG00000025708 | TYMP                   | 22:50964180-50968485  | protein_coding      |
| ENSG00000026025 | VIM                    | 10:17270257-17279592  | protein_coding      |
| ENSG00000026297 | RNASET2                | 6:167342991-167370679 | protein_coding      |
| ENSG00000026508 | CD44                   | 11:35160416-35253949  | protein_coding      |
| ENSG00000034510 | TMSB10                 | 2:85132748-85133795   | protein_coding      |
| ENSG00000034713 | GABARAPL2              | 16:75600248-75611779  | protein_coding      |
| ENSG00000038427 | VCAN                   | 5:82767283-82878122   | protein_coding      |
| ENSG00000043462 | LCP2                   | 5:169673240-169725231 | protein_coding      |
| ENSG00000048740 | CELF2                  | 10:11047258-11378674  | protein_coding      |
| ENSG00000051523 | CYBA                   | 16:88709690-88717560  | protein_coding      |
| ENSG00000059728 | MXD1                   | 2:70124819-70170077   | protein_coding      |
| ENSG00000060138 | YBX3                   | 12:10851682-10875911  | protein_coding      |
| ENSG00000060237 | WNK1                   | 12:861758-1020618     | protein_coding      |
| ENSG00000062716 | VMP1                   | 17:57784552-57919616  | protein_coding      |

|                 |          |                        |                |
|-----------------|----------|------------------------|----------------|
| ENSG00000063177 | RPL18    | 19:49118584-49122793   | protein_coding |
| ENSG00000064601 | CTSA     | 20:44518782-44527459   | protein_coding |
| ENSG00000064666 | CNN2     | 19:1026297-1039068     | protein_coding |
| ENSG00000065357 | DGKA     | 12:56321102-56347811   | protein_coding |
| ENSG00000065413 | ANKRD44  | 2:197831740-198175897  | protein_coding |
| ENSG00000066926 | FECH     | 18:55215514-55254004   | protein_coding |
| ENSG00000067182 | TNFRSF1A | 12:6437922-6451280     | protein_coding |
| ENSG00000067560 | RHOA     | 3:49396577-49450431    | protein_coding |
| ENSG00000070756 | PABPC1   | 8:101698043-101735037  | protein_coding |
| ENSG00000071082 | RPL31    | 2:101618176-101640494  | protein_coding |
| ENSG00000072135 | PTPN18   | 2:131113579-131132982  | protein_coding |
| ENSG00000072778 | ACADVL   | 17:7120443-7128592     | protein_coding |
| ENSG00000072786 | STK10    | 5:171469076-171615390  | protein_coding |
| ENSG00000073921 | PICALM   | 11:85668726-85780924   | protein_coding |
| ENSG00000075415 | SLC25A3  | 12:98987368-98995946   | protein_coding |
| ENSG00000075420 | FNDC3B   | 3:171757417-172119455  | protein_coding |
| ENSG00000075785 | RAB7A    | 3:128444964-128533639  | protein_coding |
| ENSG00000076662 | ICAM3    | 19:10444451-10450499   | protein_coding |
| ENSG00000076770 | MBNL3    | X:131503344-131623996  | protein_coding |
| ENSG00000076928 | ARHGEF1  | 19:42387227-42434302   | protein_coding |
| ENSG00000076944 | STXBP2   | 19:7701766-7712759     | protein_coding |
| ENSG00000077454 | LRCH4    | 7:100169854-100183776  | protein_coding |
| ENSG00000078304 | PPP2R5C  | 14:102228134-102394326 | protein_coding |
| ENSG00000081237 | PTPRC    | 1:198607800-198726545  | protein_coding |
| ENSG00000083845 | RPS5     | 19:58897766-58906173   | protein_coding |
| ENSG00000084070 | SMAP2    | 1:40810521-40888998    | protein_coding |
| ENSG00000084234 | APLP2    | 11:129939731-130014699 | protein_coding |
| ENSG00000085265 | FCN1     | 9:137801430-137809809  | protein_coding |
| ENSG00000085514 | PILRA    | 7:99965152-99997719    | protein_coding |
| ENSG00000087086 | FTL      | 19:49468557-49470135   | protein_coding |
| ENSG00000087460 | GNAS     | 20:57414772-57486247   | protein_coding |
| ENSG00000090013 | BLVRB    | 19:40953695-40971747   | protein_coding |

|                 |        |                       |                |
|-----------------|--------|-----------------------|----------------|
| ENSG00000090238 | YPEL3  | 16:30103634-30108236  | protein_coding |
| ENSG00000090382 | LYZ    | 12:69742120-69748014  | protein_coding |
| ENSG00000092010 | PSME1  | 14:24605366-24608176  | protein_coding |
| ENSG00000092199 | HNRNPC | 14:21677294-21737653  | protein_coding |
| ENSG00000092841 | MYL6   | 12:56551944-56557280  | protein_coding |
| ENSG00000099622 | CIRBP  | 19:1259383-1274879    | protein_coding |
| ENSG00000099875 | MKNK2  | 19:2037469-2051243    | protein_coding |
| ENSG00000100201 | DDX17  | 22:38879444-38903665  | protein_coding |
| ENSG00000100225 | FBXO7  | 22:32870662-32894818  | protein_coding |
| ENSG00000100316 | RPL3   | 22:39708886-39716394  | protein_coding |
| ENSG00000100345 | MYH9   | 22:36677326-36784063  | protein_coding |
| ENSG00000100365 | NCF4   | 22:37257029-37274057  | protein_coding |
| ENSG00000100368 | CSF2RB | 22:37309669-37336491  | protein_coding |
| ENSG00000100650 | SRSF5  | 14:70193616-70238722  | protein_coding |
| ENSG00000101109 | STK4   | 20:43595114-43708600  | protein_coding |
| ENSG00000101307 | SIRPB1 | 20:1544166-1600707    | protein_coding |
| ENSG00000101596 | SMCHD1 | 18:2655736-2805015    | protein_coding |
| ENSG00000101608 | MYL12A | 18:3247478-3256234    | protein_coding |
| ENSG00000101782 | RIOK3  | 18:21032786-21066567  | protein_coding |
| ENSG00000102096 | PIM2   | X:48770458-48776301   | protein_coding |
| ENSG00000102879 | CORO1A | 16:30194147-30200397  | protein_coding |
| ENSG00000103187 | COTL1  | 16:84599199-84651683  | protein_coding |
| ENSG00000103657 | HERC1  | 15:63900816-64126141  | protein_coding |
| ENSG00000104133 | SPG11  | 15:44854893-44955876  | protein_coding |
| ENSG00000104529 | EEF1D  | 8:144661866-144681711 | protein_coding |
| ENSG00000104765 | BNIP3L | 8:26240413-26363152   | protein_coding |
| ENSG00000104894 | CD37   | 19:49838427-49846592  | protein_coding |
| ENSG00000105193 | RPS16  | 19:39923846-39926588  | protein_coding |
| ENSG00000105221 | AKT2   | 19:40736223-40791443  | protein_coding |
| ENSG00000105372 | RPS19  | 19:42363987-42376994  | protein_coding |
| ENSG00000105483 | CARD8  | 19:48684026-48759203  | protein_coding |
| ENSG00000106829 | TLE4   | 9:82186687-82341658   | protein_coding |

|                 |          |                        |                |
|-----------------|----------|------------------------|----------------|
| ENSG00000106948 | AKNA     | 9:117096435-117156685  | protein_coding |
| ENSG00000108107 | RPL28    | 19:55896712-55914612   | protein_coding |
| ENSG00000108298 | RPL19    | 17:37356535-37360980   | protein_coding |
| ENSG00000108518 | PFN1     | 17:4848946-4852356     | protein_coding |
| ENSG00000108654 | DDX5     | 17:62495733-62504317   | protein_coding |
| ENSG00000108669 | CYTH1    | 17:76670129-76778379   | protein_coding |
| ENSG00000108946 | PRKAR1A  | 17:66507920-66547460   | protein_coding |
| ENSG00000109046 | WSB1     | 17:25621101-25640657   | protein_coding |
| ENSG00000109062 | SLC9A3R1 | 17:72744790-72765492   | protein_coding |
| ENSG00000109332 | UBE2D3   | 4:103715539-103790053  | protein_coding |
| ENSG00000109971 | HSPA8    | 11:122928196-122933938 | protein_coding |
| ENSG00000110321 | EIF4G2   | 11:10818596-10830657   | protein_coding |
| ENSG00000110324 | IL10RA   | 11:117857062-117872196 | protein_coding |
| ENSG00000110367 | DDX6     | 11:118620033-118661858 | protein_coding |
| ENSG00000110700 | RPS13    | 11:17095935-17099334   | protein_coding |
| ENSG00000110713 | NUP98    | 11:3692312-3819022     | protein_coding |
| ENSG00000110719 | TCIRG1   | 11:67806482-67818362   | protein_coding |
| ENSG00000110876 | SELPLG   | 12:109015685-109027735 | protein_coding |
| ENSG00000110955 | ATP5B    | 12:57031958-57039798   | protein_coding |
| ENSG00000111348 | ARHGDIB  | 12:15094950-15114662   | protein_coding |
| ENSG00000111640 | GAPDH    | 12:6643092-6647537     | protein_coding |
| ENSG00000111679 | PTPN6    | 12:7055630-7070479     | protein_coding |
| ENSG00000112096 | SOD2     | 6:160090088-160183561  | protein_coding |
| ENSG00000112303 | VNN2     | 6:133065008-133084598  | protein_coding |
| ENSG00000112306 | RPS12    | 6:133135579-133138703  | protein_coding |
| ENSG00000112576 | CCND3    | 6:41902670-42018095    | protein_coding |
| ENSG00000113732 | ATP6V0E1 | 5:172410759-172462448  | protein_coding |
| ENSG00000113916 | BCL6     | 3:187439164-187463515  | protein_coding |
| ENSG00000114353 | GNAI2    | 3:50263723-50296787    | protein_coding |
| ENSG00000114978 | MOB1A    | 2:74379654-74406025    | protein_coding |
| ENSG00000115091 | ACTR3    | 2:114647536-114720173  | protein_coding |
| ENSG00000115268 | RPS15    | 19:1438357-1440583     | protein_coding |



|                 |           |                        |                |
|-----------------|-----------|------------------------|----------------|
| ENSG00000115524 | SF3B1     | 2:198254507-198299815  | protein_coding |
| ENSG00000115935 | WIPF1     | 2:175424299-175547644  | protein_coding |
| ENSG00000116701 | NCF2      | 1:183524697-183560011  | protein_coding |
| ENSG00000116741 | RGS2      | 1:192778168-192781403  | protein_coding |
| ENSG00000117289 | TXNIP     | 1:145438468-145442635  | protein_coding |
| ENSG00000117335 | CD46      | 1:207925401-207968858  | protein_coding |
| ENSG00000117410 | ATP6V0B   | 1:44440158-44443967    | protein_coding |
| ENSG00000117616 | C1orf63   | 1:25568727-25664704    | protein_coding |
| ENSG00000118181 | RPS25     | 11:118886421-118889401 | protein_coding |
| ENSG00000118816 | CCNI      | 4:77968310-77997158    | protein_coding |
| ENSG00000119314 | PTBP3     | 9:114980714-115095947  | protein_coding |
| ENSG00000120071 | KANSL1    | 17:44107281-44302733   | protein_coding |
| ENSG00000121060 | TRIM25    | 17:54965269-54991399   | protein_coding |
| ENSG00000121104 | FAM117A   | 17:47787693-47866542   | protein_coding |
| ENSG00000121966 | CXCR4     | 2:136871918-136875735  | protein_coding |
| ENSG00000122406 | RPL5      | 1:93297581-93307481    | protein_coding |
| ENSG00000122566 | HNRNPA2B1 | 7:26229546-26241149    | protein_coding |
| ENSG00000122862 | SRGN      | 10:70847861-70864567   | protein_coding |
| ENSG00000123146 | CD97      | 19:14491312-14519537   | protein_coding |
| ENSG00000123329 | ARHGAP9   | 12:57866037-57882597   | protein_coding |
| ENSG00000123338 | NCKAP1L   | 12:54891494-54937726   | protein_coding |
| ENSG00000123349 | PFDN5     | 12:53689074-53693234   | protein_coding |
| ENSG00000123405 | NFE2      | 12:54685894-54694905   | protein_coding |
| ENSG00000123416 | TUBA1B    | 12:49521564-49525180   | protein_coding |
| ENSG00000124357 | NAGK      | 2:71291473-71306935    | protein_coding |
| ENSG00000124831 | LRRFIP1   | 2:238536218-238722325  | protein_coding |
| ENSG00000125347 | IRF1      | 5:131817300-131826490  | protein_coding |
| ENSG00000125505 | MBOAT7    | 19:54677106-54693733   | protein_coding |
| ENSG00000125818 | PSMF1     | 20:1093905-1160596     | protein_coding |
| ENSG00000125952 | MAX       | 14:65472891-65569413   | protein_coding |
| ENSG00000126247 | CAPNS1    | 19:36630476-36641255   | protein_coding |
| ENSG00000126267 | COX6B1    | 19:36139124-36149763   | protein_coding |

|                 |         |                       |                |
|-----------------|---------|-----------------------|----------------|
| ENSG00000126883 | NUP214  | 9:134000947-134110057 | protein_coding |
| ENSG00000127022 | CANX    | 5:179105628-179157926 | protein_coding |
| ENSG00000127483 | HP1BP3  | 1:21069153-21113816   | protein_coding |
| ENSG00000127824 | TUBA4A  | 2:220114432-220142892 | protein_coding |
| ENSG00000128016 | ZFP36   | 19:39897452-39900052  | protein_coding |
| ENSG00000128340 | RAC2    | 22:37621300-37640488  | protein_coding |
| ENSG00000129353 | SLC44A2 | 19:10713132-10755235  | protein_coding |
| ENSG00000129657 | SEC14L1 | 17:75082797-75213179  | protein_coding |
| ENSG00000130066 | SAT1    | X:23801289-23804343   | protein_coding |
| ENSG00000130429 | ARPC1B  | 7:98971871-98992424   | protein_coding |
| ENSG00000130592 | LSP1    | 11:1874199-1913497    | protein_coding |
| ENSG00000130755 | GMFG    | 19:39818992-39833012  | protein_coding |
| ENSG00000130775 | THEMIS2 | 1:28199054-28213196   | protein_coding |
| ENSG00000131051 | RBM39   | 20:34291530-34330234  | protein_coding |
| ENSG00000131171 | SH3BGRL | X:80457441-80554046   | protein_coding |
| ENSG00000131236 | CAP1    | 1:40505904-40538321   | protein_coding |
| ENSG00000131389 | SLC6A6  | 3:14444075-14530857   | protein_coding |
| ENSG00000131469 | RPL27   | 17:41150289-41154976  | protein_coding |
| ENSG00000132471 | WBP2    | 17:73841779-73852588  | protein_coding |
| ENSG00000132475 | H3F3B   | 17:73772514-73781974  | protein_coding |
| ENSG00000132510 | KDM6B   | 17:7743221-7758114    | protein_coding |
| ENSG00000132589 | FLOT2   | 17:27206352-27224697  | protein_coding |
| ENSG00000132824 | SERINC3 | 20:43124861-43150750  | protein_coding |
| ENSG00000132965 | ALOX5AP | 13:31309644-31338556  | protein_coding |
| ENSG00000133112 | TPT1    | 13:45911007-45915505  | protein_coding |
| ENSG00000133606 | MKRN1   | 7:140152839-140179369 | protein_coding |
| ENSG00000133872 | TMEM66  | 8:29920527-29940723   | protein_coding |
| ENSG00000133961 | NUMB    | 14:73741814-73930348  | protein_coding |
| ENSG00000134294 | SLC38A2 | 12:46751971-46766650  | protein_coding |
| ENSG00000134419 | RPS15A  | 16:18792616-18801705  | protein_coding |
| ENSG00000134851 | TMEM165 | 4:56262123-56319564   | protein_coding |
| ENSG00000135655 | USP15   | 12:62654118-62811211  | protein_coding |

|                 |          |                        |                |
|-----------------|----------|------------------------|----------------|
| ENSG00000135821 | GLUL     | 1:182350838-182361341  | protein_coding |
| ENSG00000135899 | SP110    | 2:231032008-231090444  | protein_coding |
| ENSG00000136156 | ITM2B    | 13:48807293-48837063   | protein_coding |
| ENSG00000136167 | LCP1     | 13:46700054-46786006   | protein_coding |
| ENSG00000136560 | TANK     | 2:161993418-162092732  | protein_coding |
| ENSG00000137154 | RPS6     | 9:19375712-19380252    | protein_coding |
| ENSG00000137207 | YIPF3    | 6:43479564-43484728    | protein_coding |
| ENSG00000137845 | ADAM10   | 15:58887402-59042177   | protein_coding |
| ENSG00000138293 | NCOA4    | 10:51565107-51590734   | protein_coding |
| ENSG00000139318 | DUSP6    | 12:89741008-89747048   | protein_coding |
| ENSG00000139436 | GIT2     | 12:110367606-110434194 | protein_coding |
| ENSG00000140199 | SLC12A6  | 15:34525459-34630261   | protein_coding |
| ENSG00000140264 | SERF2    | 15:44069284-44094787   | protein_coding |
| ENSG00000140455 | USP3     | 15:63796792-63886839   | protein_coding |
| ENSG00000140497 | SCAMP2   | 15:75136070-75165706   | protein_coding |
| ENSG00000140575 | IQGAP1   | 15:90931449-91045475   | protein_coding |
| ENSG00000140678 | ITGAX    | 16:31366454-31394318   | protein_coding |
| ENSG00000140853 | NLRC5    | 16:57023396-57117443   | protein_coding |
| ENSG00000141279 | NPEPPS   | 17:45600307-45700642   | protein_coding |
| ENSG00000141298 | SSH2     | 17:27952955-28257294   | protein_coding |
| ENSG00000141480 | ARRB2    | 17:4613783-4624794     | protein_coding |
| ENSG00000142347 | MYO1F    | 19:8585673-8642461     | protein_coding |
| ENSG00000142534 | RPS11    | 19:49999621-50002946   | protein_coding |
| ENSG00000142634 | EFHD2    | 1:15736390-15756839    | protein_coding |
| ENSG00000142657 | PGD      | 1:10458648-10480201    | protein_coding |
| ENSG00000142669 | SH3BGRL3 | 1:26605666-26608007    | protein_coding |
| ENSG00000142676 | RPL11    | 1:24018268-24022915    | protein_coding |
| ENSG00000142937 | RPS8     | 1:45240922-45244451    | protein_coding |
| ENSG00000143119 | CD53     | 1:111415774-111442550  | protein_coding |
| ENSG00000143384 | MCL1     | 1:150547031-150552066  | protein_coding |
| ENSG00000143409 | FAM63A   | 1:150969024-150980851  | protein_coding |
| ENSG00000143546 | S100A8   | 1:153362507-153363664  | protein_coding |

|                 |          |                        |                |
|-----------------|----------|------------------------|----------------|
| ENSG00000143549 | TPM3     | 1:154127783-154167124  | protein_coding |
| ENSG00000143761 | ARF1     | 1:228270360-228286912  | protein_coding |
| ENSG00000143774 | GUK1     | 1:228327662-228336685  | protein_coding |
| ENSG00000145335 | SNCA     | 4:90645249-90759466    | protein_coding |
| ENSG00000145495 | MARCH6   | 5:10353814-10440500    | protein_coding |
| ENSG00000145592 | RPL37    | 5:40825363-40835437    | protein_coding |
| ENSG00000146112 | PPP1R18  | 6:30644165-30655672    | protein_coding |
| ENSG00000146278 | PNRC1    | 6:89790469-89794879    | protein_coding |
| ENSG00000147065 | MSN      | X:64808256-64961791    | protein_coding |
| ENSG00000147162 | OGT      | X:70752932-70795747    | protein_coding |
| ENSG00000147168 | IL2RG    | X:70327253-70331958    | protein_coding |
| ENSG00000147416 | ATP6V1B2 | 8:20054877-20084330    | protein_coding |
| ENSG00000147454 | SLC25A37 | 8:23386317-23432976    | protein_coding |
| ENSG00000148700 | ADD3     | 10:111756125-111895323 | protein_coding |
| ENSG00000149273 | RPS3     | 11:75110529-75133324   | protein_coding |
| ENSG00000149311 | ATM      | 11:108093210-108239829 | protein_coding |
| ENSG00000149806 | FAU      | 11:64888099-64889945   | protein_coding |
| ENSG00000149925 | ALDOA    | 16:30064410-30081778   | protein_coding |
| ENSG00000150991 | UBC      | 12:125396149-125401914 | protein_coding |
| ENSG00000151702 | FLI1     | 11:128556429-128683162 | protein_coding |
| ENSG00000151883 | PARP8    | 5:49961732-50142356    | protein_coding |
| ENSG00000152601 | MBNL1    | 3:151961616-152183569  | protein_coding |
| ENSG00000153187 | HNRNPU   | 1:245014467-245027844  | protein_coding |
| ENSG00000153827 | TRIP12   | 2:230628553-230787955  | protein_coding |
| ENSG00000155926 | SLA      | 8:134048972-134115298  | protein_coding |
| ENSG00000155957 | TMBIM4   | 12:66517708-66563852   | protein_coding |
| ENSG00000156482 | RPL30    | 8:99037078-99058697    | protein_coding |
| ENSG00000156508 | EEF1A1   | 6:74225472-74233520    | protein_coding |
| ENSG00000157514 | TSC22D3  | X:106956450-107020572  | protein_coding |
| ENSG00000158517 | NCF1     | 7:74188308-74203659    | protein_coding |
| ENSG00000158578 | ALAS2    | X:55035487-55057497    | protein_coding |
| ENSG00000158710 | TAGLN2   | 1:159887896-159895522  | protein_coding |

|                 |          |                        |                |
|-----------------|----------|------------------------|----------------|
| ENSG00000158856 | DMTN     | 8:21906505-21940038    | protein_coding |
| ENSG00000158869 | FCER1G   | 1:161185023-161190489  | protein_coding |
| ENSG00000159023 | EPB41    | 1:29213602-29446553    | protein_coding |
| ENSG00000159314 | ARHGAP27 | 17:43471274-43511787   | protein_coding |
| ENSG00000159346 | ADIPOR1  | 1:202909950-202927700  | protein_coding |
| ENSG00000159377 | PSMB4    | 1:151372009-151374420  | protein_coding |
| ENSG00000159592 | GPBP1L1  | 1:46092975-46153785    | protein_coding |
| ENSG00000159720 | ATP6V0D1 | 16:67471916-67515140   | protein_coding |
| ENSG00000160255 | ITGB2    | 21:46305867-46351904   | protein_coding |
| ENSG00000160410 | SHKBP1   | 19:41082756-41097305   | protein_coding |
| ENSG00000160593 | AMICA1   | 11:118064454-118095809 | protein_coding |
| ENSG00000161011 | SQSTM1   | 5:179233387-179265078  | protein_coding |
| ENSG00000162434 | JAK1     | 1:65298911-65432187    | protein_coding |
| ENSG00000162511 | LAPTM5   | 1:31205315-31230667    | protein_coding |
| ENSG00000162704 | ARPC5    | 1:183592400-183604892  | protein_coding |
| ENSG00000163041 | H3F3A    | 1:226249551-226259702  | protein_coding |
| ENSG00000163131 | CTSS     | 1:150702671-150738433  | protein_coding |
| ENSG00000163162 | RNF149   | 2:101887680-101925163  | protein_coding |
| ENSG00000163191 | S100A11  | 1:152004981-152020383  | protein_coding |
| ENSG00000163219 | ARHGAP25 | 2:68906732-69053965    | protein_coding |
| ENSG00000163220 | S100A9   | 1:153330329-153333503  | protein_coding |
| ENSG00000163466 | ARPC2    | 2:219081816-219119079  | protein_coding |
| ENSG00000163660 | CCNL1    | 3:156864296-156878549  | protein_coding |
| ENSG00000163736 | PPBP     | 4:74852754-74853914    | protein_coding |
| ENSG00000163931 | TKT      | 3:53258722-53290068    | protein_coding |
| ENSG00000164054 | SHISA5   | 3:48509196-48542259    | protein_coding |
| ENSG00000164329 | PAPD4    | 5:78907942-78982471    | protein_coding |
| ENSG00000164587 | RPS14    | 5:149822752-149829319  | protein_coding |
| ENSG00000164733 | CTSB     | 8:11700032-11726957    | protein_coding |
| ENSG00000164924 | YWHAZ    | 8:101928752-101965616  | protein_coding |
| ENSG00000165071 | TMEM71   | 8:133697252-133772958  | protein_coding |
| ENSG00000165406 | MARCH8   | 10:45950034-46090354   | protein_coding |

|                 |          |                        |                |
|-----------------|----------|------------------------|----------------|
| ENSG00000166046 | TCP11L2  | 12:106695706-106740793 | protein_coding |
| ENSG00000166340 | TPP1     | 11:6633999-6640692     | protein_coding |
| ENSG00000166579 | NDEL1    | 17:8316448-8393729     | protein_coding |
| ENSG00000166710 | B2M      | 15:45003674-45011075   | protein_coding |
| ENSG00000166783 | KIAA0430 | 16:15688242-15737023   | protein_coding |
| ENSG00000166825 | ANPEP    | 15:90328119-90358633   | protein_coding |
| ENSG00000166888 | STAT6    | 12:57489190-57525922   | protein_coding |
| ENSG00000167173 | C15orf39 | 15:75487983-75504510   | protein_coding |
| ENSG00000167526 | RPL13    | 16:89627064-89630950   | protein_coding |
| ENSG00000167552 | TUBA1A   | 12:49578578-49583107   | protein_coding |
| ENSG00000167553 | TUBA1C   | 12:49582518-49667114   | protein_coding |
| ENSG00000167615 | LENG8    | 19:54960064-54973217   | protein_coding |
| ENSG00000167658 | EEF2     | 19:3976053-3985467     | protein_coding |
| ENSG00000167978 | SRRM2    | 16:2802329-2822539     | protein_coding |
| ENSG00000167996 | FTH1     | 11:61727189-61735132   | protein_coding |
| ENSG00000168010 | ATG16L2  | 11:72525352-72554719   | protein_coding |
| ENSG00000168066 | SF1      | 11:64532077-64546258   | protein_coding |
| ENSG00000168298 | HIST1H1E | 6:26156558-26157343    | protein_coding |
| ENSG00000168310 | IRF2     | 4:185308866-185395734  | protein_coding |
| ENSG00000168394 | TAP1     | 6:32812985-32821755    | protein_coding |
| ENSG00000169045 | HNRNPH1  | 5:179041178-179061785  | protein_coding |
| ENSG00000169100 | SLC25A6  | X:1505044-1511617      | protein_coding |
| ENSG00000169180 | XPO6     | 16:28109299-28223241   | protein_coding |
| ENSG00000169442 | CD52     | 1:26644447-26647014    | protein_coding |
| ENSG00000169554 | ZEB2     | 2:145141647-145282147  | protein_coding |
| ENSG00000169564 | PCBP1    | 2:70314584-70316332    | protein_coding |
| ENSG00000169896 | ITGAM    | 16:31271310-31344213   | protein_coding |
| ENSG00000170248 | PDCD6IP  | 3:33839843-33911194    | protein_coding |
| ENSG00000170296 | GABARAP  | 17:7143332-7146089     | protein_coding |
| ENSG00000170315 | UBB      | 17:16284111-16286059   | protein_coding |
| ENSG00000170776 | AKAP13   | 15:85923801-86292586   | protein_coding |
| ENSG00000170889 | RPS9     | 19:54704609-54752862   | protein_coding |

|                 |           |                       |                |
|-----------------|-----------|-----------------------|----------------|
| ENSG00000171051 | FPR1      | 19:52248424-52307363  | protein_coding |
| ENSG00000171552 | BCL2L1    | 20:30252254-30311792  | protein_coding |
| ENSG00000172081 | MOB3A     | 19:2071036-2096672    | protein_coding |
| ENSG00000172270 | BSG       | 19:571296-583493      | protein_coding |
| ENSG00000172493 | AFF1      | 4:87856153-88062206   | protein_coding |
| ENSG00000172757 | CFL1      | 11:65590492-65629497  | protein_coding |
| ENSG00000172795 | DCP2      | 5:112312398-112356667 | protein_coding |
| ENSG00000172809 | RPL38     | 17:72199720-72206794  | protein_coding |
| ENSG00000172936 | MYD88     | 3:38179968-38184513   | protein_coding |
| ENSG00000173559 | NABP1     | 2:192542793-192561385 | protein_coding |
| ENSG00000173575 | CHD2      | 15:93426525-93571237  | protein_coding |
| ENSG00000173812 | EIF1      | 17:39845136-39848920  | protein_coding |
| ENSG00000173889 | PHC3      | 3:169804519-169899537 | protein_coding |
| ENSG00000174444 | RPL4      | 15:66790354-66816870  | protein_coding |
| ENSG00000174748 | RPL15     | 3:23958035-23965183   | protein_coding |
| ENSG00000175215 | CTDSP2    | 12:58213709-58240522  | protein_coding |
| ENSG00000175567 | UCP2      | 11:73685711-73694352  | protein_coding |
| ENSG00000177105 | RHOG      | 11:3848207-3862213    | protein_coding |
| ENSG00000177156 | TALDO1    | 11:747328-765024      | protein_coding |
| ENSG00000177600 | RPLP2     | 11:809646-812880      | protein_coding |
| ENSG00000177663 | IL17RA    | 22:17565843-17596583  | protein_coding |
| ENSG00000177885 | GRB2      | 17:73314156-73401790  | protein_coding |
| ENSG00000177954 | RPS27     | 1:153963234-153964626 | protein_coding |
| ENSG00000178719 | GRINA     | 8:145064225-145067583 | protein_coding |
| ENSG00000178927 | C17orf62  | 17:80400464-80408705  | protein_coding |
| ENSG00000179820 | MYADM     | 19:54369476-54379691  | protein_coding |
| ENSG00000180353 | HCLS1     | 3:121350245-121379774 | protein_coding |
| ENSG00000180573 | HIST1H2AC | 6:26124372-26139344   | protein_coding |
| ENSG00000180596 | HIST1H2BC | 6:26115100-26124154   | protein_coding |
| ENSG00000180871 | CXCR2     | 2:218990011-219001976 | protein_coding |
| ENSG00000181274 | FRAT2     | 10:99092254-99094458  | protein_coding |
| ENSG00000181788 | SIAH2     | 3:150458913-150481264 | protein_coding |

|                 |          |                        |                |
|-----------------|----------|------------------------|----------------|
| ENSG00000182578 | CSF1R    | 5:149432853-149492935  | protein_coding |
| ENSG00000182899 | RPL35A   | 3:197676857-197683481  | protein_coding |
| ENSG00000183283 | DAZAP2   | 12:51632075-51665146   | protein_coding |
| ENSG00000183486 | MX2      | 21:42733869-42781317   | protein_coding |
| ENSG00000183508 | FAM46C   | 1:118148555-118170994  | protein_coding |
| ENSG00000184007 | PTP4A2   | 1:32372021-32410457    | protein_coding |
| ENSG00000184009 | ACTG1    | 17:79476996-79490873   | protein_coding |
| ENSG00000184922 | FMNL1    | 17:43298810-43324687   | protein_coding |
| ENSG00000185201 | IFITM2   | 11:307630-315272       | protein_coding |
| ENSG00000185215 | TNFAIP2  | 14:103589778-103603776 | protein_coding |
| ENSG00000185236 | RAB11B   | 19:8454864-8469318     | protein_coding |
| ENSG00000185650 | ZFP36L1  | 14:69254376-69263190   | protein_coding |
| ENSG00000185811 | IKZF1    | 7:50343719-50472799    | protein_coding |
| ENSG00000185864 | NPIP4    | 16:21845889-21892148   | protein_coding |
| ENSG00000185883 | ATP6V0C  | 16:2563870-2570219     | protein_coding |
| ENSG00000185905 | C16orf54 | 16:29753783-29757327   | protein_coding |
| ENSG00000187446 | CHP1     | 15:41523036-41574043   | protein_coding |
| ENSG00000187764 | SEMA4D   | 9:91975701-92113045    | protein_coding |
| ENSG00000188186 | LAMTOR4  | 7:99746529-99753567    | protein_coding |
| ENSG00000188404 | SELL     | 1:169659807-169680839  | protein_coding |
| ENSG00000196126 | HLA-DRB1 | 6:32546545-32557625    | protein_coding |
| ENSG00000196154 | S100A4   | 1:153516088-153522612  | protein_coding |
| ENSG00000196352 | CD55     | 1:207494852-207534311  | protein_coding |
| ENSG00000196405 | EVL      | 14:100437785-100610573 | protein_coding |
| ENSG00000196531 | NACA     | 12:57106211-57125412   | protein_coding |
| ENSG00000197081 | IGF2R    | 6:160390130-160534539  | protein_coding |
| ENSG00000197111 | PCBP2    | 12:53835524-53874946   | protein_coding |
| ENSG00000197249 | SERPINA1 | 14:94843083-94857030   | protein_coding |
| ENSG00000197324 | LRP10    | 14:23340821-23350789   | protein_coding |
| ENSG00000197448 | GSTK1    | 7:142941185-142967947  | protein_coding |
| ENSG00000197548 | ATG7     | 3:11313994-11599139    | protein_coding |
| ENSG00000197622 | CDC42SE1 | 1:151023446-151042801  | protein_coding |



|                 |         |                        |                |
|-----------------|---------|------------------------|----------------|
| ENSG00000197629 | MPEG1   | 11:58975982-58980424   | protein_coding |
| ENSG00000197746 | PSAP    | 10:73576054-73611126   | protein_coding |
| ENSG00000197756 | RPL37A  | 2:217362911-217443903  | protein_coding |
| ENSG00000197956 | S100A6  | 1:153507074-153508720  | protein_coding |
| ENSG00000197971 | MBP     | 18:74690782-74845639   | protein_coding |
| ENSG00000198408 | MGEA5   | 10:103544199-103578696 | protein_coding |
| ENSG00000198563 | DDX39B  | 6:31497995-31510225    | protein_coding |
| ENSG00000198625 | MDM4    | 1:204485510-204542871  | protein_coding |
| ENSG00000198668 | CALM1   | 14:90862845-90874605   | protein_coding |
| ENSG00000198712 | MT-CO2  | MT:7585-8269           | protein_coding |
| ENSG00000198727 | MT-CYB  | MT:14746-15887         | protein_coding |
| ENSG00000198755 | RPL10A  | 6:35436184-35438562    | protein_coding |
| ENSG00000198763 | MT-ND2  | MT:4469-5511           | protein_coding |
| ENSG00000198786 | MT-ND5  | MT:12336-14148         | protein_coding |
| ENSG00000198804 | MT-CO1  | MT:5903-7445           | protein_coding |
| ENSG00000198837 | DENND4B | 1:153901976-153919172  | protein_coding |
| ENSG00000198840 | MT-ND3  | MT:10058-10404         | protein_coding |
| ENSG00000198851 | CD3E    | 11:118175259-118186890 | protein_coding |
| ENSG00000198858 | R3HDM4  | 19:896502-913240       | protein_coding |
| ENSG00000198876 | DCAF12  | 9:34086384-34127397    | protein_coding |
| ENSG00000198886 | MT-ND4  | MT:10759-12137         | protein_coding |
| ENSG00000198888 | MT-ND1  | MT:3306-4262           | protein_coding |
| ENSG00000198938 | MT-CO3  | MT:9206-9990           | protein_coding |
| ENSG00000204160 | ZDHHC18 | 1:27153200-27184093    | protein_coding |
| ENSG00000204287 | HLA-DRA | 6:32407618-32412823    | protein_coding |
| ENSG00000204463 | BAG6    | 6:31606804-31620482    | protein_coding |
| ENSG00000204472 | AIF1    | 6:31582960-31584798    | protein_coding |
| ENSG00000204592 | HLA-E   | 6:30457243-30461982    | protein_coding |
| ENSG00000204628 | GNB2L1  | 5:180663908-180675096  | protein_coding |
| ENSG00000204642 | HLA-F   | 6:29690551-29706305    | protein_coding |
| ENSG00000205352 | PRR13   | 12:53835388-53840429   | protein_coding |
| ENSG00000205542 | TMSB4X  | X:12993226-12995346    | protein_coding |

|                 |           |                        |                |
|-----------------|-----------|------------------------|----------------|
| ENSG00000206503 | HLA-A     | 6:29909036-29913661    | protein_coding |
| ENSG00000212907 | MT-ND4L   | MT:10469-10766         | protein_coding |
| ENSG00000213145 | CRIP1     | 14:105952653-105955284 | protein_coding |
| ENSG00000213240 | NOTCH2NL  | 1:145209118-145291972  | protein_coding |
| ENSG00000213719 | CLIC1     | 6:31698357-31707540    | protein_coding |
| ENSG00000213928 | IRF9      | 14:24630261-24635774   | protein_coding |
| ENSG00000213983 | AP1G2     | 14:24028773-24037279   | protein_coding |
| ENSG00000214078 | CPNE1     | 20:34213952-34252878   | protein_coding |
| ENSG00000215301 | DDX3X     | X:41192650-41223725    | protein_coding |
| ENSG00000216490 | IFI30     | 19:18283971-18288927   | protein_coding |
| ENSG00000221983 | UBA52     | 19:18682539-18688360   | protein_coding |
| ENSG00000227507 | LTB       | 6:31548301-31550299    | protein_coding |
| ENSG00000228253 | MT-ATP8   | MT:8365-8572           | protein_coding |
| ENSG00000228474 | OST4      | 2:27293339-27294641    | protein_coding |
| ENSG00000231389 | HLA-DPA1  | 6:33032345-33048552    | protein_coding |
| ENSG00000231925 | TAPBP     | 6:33267470-33282164    | protein_coding |
| ENSG00000234745 | HLA-B     | 6:31321648-31324965    | protein_coding |
| ENSG00000240065 | PSMB9     | 6:32811912-32827362    | protein_coding |
| ENSG00000241553 | ARPC4     | 3:9834178-9849410      | protein_coding |
| ENSG00000243716 | NPIP5     | 16:22490441-22547842   | protein_coding |
| ENSG00000255823 | MTRNR2L8  | 11:10529433-10530723   | protein_coding |
| ENSG00000269028 | MTRNR2L12 | 3:96335980-96337000    | protein_coding |

**Supplemental Table 4. GO analysis of 435 protein coding genes**

| Category        | Term                                          | Count | %     | PValue   | Fold Enrichment | Benjamini_FDR |
|-----------------|-----------------------------------------------|-------|-------|----------|-----------------|---------------|
| GOTERM_BP_FAT   | GO:0006414~translational elongation           | 41    | 10.25 | 1.32E-37 | 15.78036        | 2.64E-34      |
| SP_PIR_KEYWORDS | ribosome                                      | 34    | 8.5   | 2.03E-36 | 22.45305        | 7.88E-34      |
| SP_PIR_KEYWORDS | acetylation                                   | 151   | 37.75 | 7.58E-34 | 2.762585        | 1.47E-31      |
| GOTERM_CC_FAT   | GO:0022626~cytosolic ribosome                 | 34    | 8.5   | 9.95E-32 | 16.35757        | 3.40E-29      |
| SP_PIR_KEYWORDS | phosphoprotein                                | 259   | 64.75 | 1.58E-28 | 1.719107        | 2.04E-26      |
| SP_PIR_KEYWORDS | ribosomal protein                             | 38    | 9.5   | 1.14E-25 | 9.744174        | 1.11E-23      |
| SP_PIR_KEYWORDS | ribonucleoprotein                             | 44    | 11    | 3.53E-25 | 7.602699        | 2.75E-23      |
| KEGG_PATHWAY    | hsa03010:Ribosome                             | 35    | 8.75  | 2.39E-25 | 9.559297        | 2.77E-23      |
| SP_PIR_KEYWORDS | protein biosynthesis                          | 37    | 9.25  | 1.43E-24 | 9.487749        | 9.26E-23      |
| GOTERM_CC_FAT   | GO:0033279~ribosomal subunit                  | 33    | 8.25  | 3.80E-23 | 10.04683        | 6.50E-21      |
| GOTERM_MF_FAT   | GO:0003735~structural constituent of ribosome | 37    | 9.25  | 3.31E-23 | 8.459619        | 1.84E-20      |
| GOTERM_CC_FAT   | GO:0005840~ribosome                           | 40    | 10    | 1.62E-22 | 7.250142        | 1.85E-20      |
| GOTERM_CC_FAT   | GO:0022627~cytosolic small ribosomal subunit  | 21    | 5.25  | 6.85E-22 | 20.45899        | 5.86E-20      |
| GOTERM_CC_FAT   | GO:0044445~cytosolic part                     | 34    | 8.5   | 9.46E-22 | 8.716865        | 6.47E-20      |
| GOTERM_CC_FAT   | GO:0030529~ribonucleoprotein complex          | 55    | 13.75 | 2.92E-19 | 4.161793        | 1.66E-17      |
| GOTERM_CC_FAT   | GO:0005829~cytosol                            | 90    | 22.5  | 2.83E-18 | 2.637035        | 1.38E-16      |
| GOTERM_BP_FAT   | GO:0006412~translation                        | 44    | 11    | 7.76E-19 | 5.167483        | 7.78E-16      |
| GOTERM_CC_FAT   | GO:0015935~small ribosomal subunit            | 21    | 5.25  | 3.82E-17 | 12.98984        | 1.63E-15      |
| SP_PIR_KEYWORDS | heterodimer                                   | 20    | 5     | 3.27E-13 | 9.360781        | 1.82E-11      |
| GOTERM_MF_FAT   | GO:0005198~structural molecule activity       | 53    | 13.25 | 1.03E-13 | 3.211034        | 2.87E-11      |
| GOTERM_CC_FAT   | GO:0043228~non-membrane-bounded organelle     | 121   | 30.25 | 2.89E-12 | 1.816376        | 1.10E-10      |
|                 | GO:0043232~intracellular non-membrane-bounded |       |       |          |                 |               |
| GOTERM_CC_FAT   | organelle                                     | 121   | 30.25 | 2.89E-12 | 1.816376        | 1.10E-10      |
| GOTERM_MF_FAT   | GO:0003723~RNA binding                        | 53    | 13.25 | 1.28E-11 | 2.83537         | 2.37E-09      |
| SP_PIR_KEYWORDS | cytoplasm                                     | 122   | 30.5  | 7.13E-11 | 1.76512         | 3.47E-09      |
| GOTERM_CC_FAT   | GO:0022625~cytosolic large ribosomal subunit  | 12    | 3     | 1.69E-09 | 12.30616        | 5.77E-08      |
| SP_PIR_KEYWORDS | host-virus interaction                        | 26    | 6.5   | 1.39E-09 | 4.397925        | 6.01E-08      |
| SP_PIR_KEYWORDS | actin-binding                                 | 24    | 6     | 2.03E-09 | 4.68418         | 7.90E-08      |
| GOTERM_CC_FAT   | GO:0015629~actin cytoskeleton                 | 27    | 6.75  | 5.79E-09 | 3.911438        | 1.80E-07      |

|                 |                                                                     |    |      |          |          |          |
|-----------------|---------------------------------------------------------------------|----|------|----------|----------|----------|
| GOTERM_BP_FAT   | GO:0048002~antigen processing and presentation of peptide antigen   | 11 | 2.75 | 9.43E-10 | 15.27176 | 6.30E-07 |
| SP_PIR_KEYWORDS | transmembrane protein                                               | 38 | 9.5  | 2.11E-08 | 2.853434 | 7.45E-07 |
| GOTERM_MF_FAT   | GO:0003779~actin binding                                            | 30 | 7.5  | 7.06E-09 | 3.534777 | 9.82E-07 |
| GOTERM_BP_FAT   | GO:0030029~actin filament-based process                             | 26 | 6.5  | 2.96E-09 | 4.193828 | 1.48E-06 |
| GOTERM_BP_FAT   | GO:0030036~actin cytoskeleton organization                          | 25 | 6.25 | 3.86E-09 | 4.300173 | 1.55E-06 |
| GOTERM_BP_FAT   | GO:0006955~immune response                                          | 46 | 11.5 | 7.09E-09 | 2.591571 | 2.37E-06 |
| SP_PIR_KEYWORDS | methylation                                                         | 21 | 5.25 | 1.68E-07 | 4.183341 | 5.44E-06 |
| GOTERM_BP_FAT   | GO:0006952~defense response                                         | 42 | 10.5 | 1.91E-08 | 2.65478  | 5.46E-06 |
| GOTERM_BP_FAT   | GO:0019882~antigen processing and presentation                      | 15 | 3.75 | 2.19E-08 | 7.025343 | 5.49E-06 |
| SP_PIR_KEYWORDS | nucleotide binding                                                  | 14 | 3.5  | 3.27E-07 | 6.307591 | 9.79E-06 |
| SP_PIR_KEYWORDS | EF hand                                                             | 11 | 2.75 | 3.85E-07 | 8.838137 | 1.07E-05 |
| GOTERM_MF_FAT   | GO:0008092~cytoskeletal protein binding                             | 36 | 9    | 1.10E-07 | 2.74366  | 1.22E-05 |
| KEGG_PATHWAY    | hsa04612:Antigen processing and presentation                        | 17 | 4.25 | 2.19E-07 | 4.866851 | 1.27E-05 |
| SP_PIR_KEYWORDS | P-loop                                                              | 14 | 3.5  | 8.40E-07 | 5.818209 | 2.18E-05 |
| GOTERM_CC_FAT   | GO:0015934~large ribosomal subunit                                  | 12 | 3    | 9.29E-07 | 6.979614 | 2.65E-05 |
| SP_PIR_KEYWORDS | cytoskeleton                                                        | 34 | 8.5  | 1.33E-06 | 2.577158 | 3.24E-05 |
| SP_PIR_KEYWORDS | ubl conjugation                                                     | 32 | 8    | 2.04E-06 | 2.623566 | 4.66E-05 |
| GOTERM_CC_FAT   | GO:0031252~cell leading edge                                        | 16 | 4    | 2.42E-06 | 4.518204 | 6.38E-05 |
| SP_PIR_KEYWORDS | blocked amino end                                                   | 12 | 3    | 3.10E-06 | 6.288003 | 6.71E-05 |
| KEGG_PATHWAY    | hsa05130:Pathogenic Escherichia coli infection                      | 13 | 3.25 | 2.86E-06 | 5.419331 | 1.11E-04 |
| SP_PIR_KEYWORDS | duplication                                                         | 18 | 4.5  | 5.74E-06 | 3.805896 | 1.17E-04 |
| GOTERM_BP_FAT   | GO:0019884~antigen processing and presentation of exogenous antigen | 7  | 1.75 | 6.89E-07 | 19.43678 | 1.53E-04 |
| KEGG_PATHWAY    | hsa05416:Viral myocarditis                                          | 14 | 3.5  | 5.72E-06 | 4.685402 | 1.66E-04 |
| GOTERM_CC_FAT   | GO:0005773~vacuole                                                  | 21 | 5.25 | 7.53E-06 | 3.247459 | 1.84E-04 |
| UP_SEQ_FEATURE  | mutagenesis site                                                    | 78 | 19.5 | 1.74E-07 | 1.827079 | 2.20E-04 |
| SP_PIR_KEYWORDS | isopeptide bond                                                     | 21 | 5.25 | 1.20E-05 | 3.173569 | 2.33E-04 |
| GOTERM_CC_FAT   | GO:0005885~Arp2/3 protein complex                                   | 5  | 1.25 | 1.39E-05 | 27.83537 | 3.16E-04 |
| GOTERM_BP_FAT   | GO:0006928~cell motion                                              | 32 | 8    | 1.80E-06 | 2.618851 | 3.60E-04 |
| SP_PIR_KEYWORDS | rna-binding                                                         | 28 | 7    | 2.41E-05 | 2.499675 | 4.46E-04 |
| SP_PIR_KEYWORDS | mhc i                                                               | 5  | 1.25 | 3.44E-05 | 24.10401 | 6.07E-04 |

|                 |                                                                                   |    |      |          |          |          |
|-----------------|-----------------------------------------------------------------------------------|----|------|----------|----------|----------|
| GOTERM_BP_FAT   | GO:0002478~antigen processing and presentation of exogenous peptide antigen       | 6  | 1.5  | 4.39E-06 | 21.20376 | 7.33E-04 |
| GOTERM_BP_FAT   | GO:0045321~leukocyte activation                                                   | 21 | 5.25 | 4.33E-06 | 3.373326 | 7.88E-04 |
| UP_SEQ_FEATURE  | domain:Ig-like C1-type                                                            | 9  | 2.25 | 1.41E-06 | 10.77801 | 8.94E-04 |
| SP_PIR_KEYWORDS | calcium binding                                                                   | 11 | 2.75 | 5.48E-05 | 5.148429 | 9.26E-04 |
| SP_PIR_KEYWORDS | immune response                                                                   | 16 | 4    | 7.02E-05 | 3.44343  | 0.001138 |
| GOTERM_BP_FAT   | GO:0007010~cytoskeleton organization                                              | 29 | 7.25 | 7.95E-06 | 2.585627 | 0.001224 |
| GOTERM_CC_FAT   | GO:0031988~membrane-bounded vesicle                                               | 32 | 8    | 5.78E-05 | 2.195465 | 0.001235 |
| GOTERM_BP_FAT   | GO:0045730~respiratory burst                                                      | 6  | 1.5  | 1.17E-05 | 17.94164 | 0.001676 |
| GOTERM_CC_FAT   | GO:0000323~lytic vacuole                                                          | 17 | 4.25 | 1.05E-04 | 3.139724 | 0.00212  |
| GOTERM_CC_FAT   | GO:0005764~lysosome                                                               | 17 | 4.25 | 1.05E-04 | 3.139724 | 0.00212  |
| GOTERM_BP_FAT   | GO:0001775~cell activation                                                        | 22 | 5.5  | 1.65E-05 | 2.979855 | 0.002197 |
| GOTERM_CC_FAT   | GO:0005856~cytoskeleton                                                           | 58 | 14.5 | 1.72E-04 | 1.636663 | 0.003271 |
| SP_PIR_KEYWORDS | RNA binding                                                                       | 6  | 1.5  | 2.45E-04 | 10.33029 | 0.003813 |
| GOTERM_CC_FAT   | GO:0031982~vesicle                                                                | 34 | 8.5  | 2.32E-04 | 1.977557 | 0.003965 |
| SMART           | SM00407:IGc1                                                                      | 10 | 2.5  | 2.60E-05 | 6.268296 | 0.003968 |
| GOTERM_CC_FAT   | GO:0030863~cortical cytoskeleton                                                  | 8  | 2    | 2.29E-04 | 6.362369 | 0.004121 |
| SP_PIR_KEYWORDS | diamond-blackfan anemia                                                           | 4  | 1    | 2.89E-04 | 27.54744 | 0.004319 |
| SP_PIR_KEYWORDS | Proto-oncogene                                                                    | 15 | 3.75 | 3.27E-04 | 3.144001 | 0.0047   |
| SP_PIR_KEYWORDS | rrna-binding                                                                      | 5  | 1.25 | 3.47E-04 | 14.17883 | 0.004811 |
| KEGG_PATHWAY    | hsa04810:Regulation of actin cytoskeleton                                         | 22 | 5.5  | 2.19E-04 | 2.431428 | 0.005061 |
| GOTERM_CC_FAT   | GO:0033179~proton-transporting V-type ATPase, VO domain                           | 4  | 1    | 3.13E-04 | 25.97967 | 0.005091 |
| SP_PIR_KEYWORDS | Hydrogen ion transport                                                            | 7  | 1.75 | 4.45E-04 | 7.030336 | 0.005952 |
| GOTERM_BP_FAT   | GO:0002474~antigen processing and presentation of peptide antigen via MHC class I | 6  | 1.5  | 5.18E-05 | 13.72008 | 0.006085 |
| GOTERM_BP_FAT   | GO:0034621~cellular macromolecular complex subunit organization                   | 24 | 6    | 4.91E-05 | 2.613349 | 0.00613  |
| SP_PIR_KEYWORDS | ADP-ribosylation                                                                  | 6  | 1.5  | 5.45E-04 | 8.765095 | 0.007038 |
| SP_PIR_KEYWORDS | methylated amino acid                                                             | 5  | 1.25 | 6.73E-04 | 12.05201 | 0.008408 |
| GOTERM_CC_FAT   | GO:0005884~actin filament                                                         | 7  | 1.75 | 5.66E-04 | 6.653331 | 0.008755 |
| GOTERM_CC_FAT   | GO:0042611~MHC protein complex                                                    | 8  | 2    | 5.93E-04 | 5.469405 | 0.00878  |
| GOTERM_CC_FAT   | GO:0030864~cortical actin cytoskeleton                                            | 6  | 1.5  | 6.43E-04 | 8.35061  | 0.009131 |

|                 |                                                          |    |      |          |          |          |
|-----------------|----------------------------------------------------------|----|------|----------|----------|----------|
| GOTERM_BP_FAT   | GO:0007015~actin filament organization                   | 10 | 2.5  | 8.88E-05 | 5.399106 | 0.00984  |
| SP_PIR_KEYWORDS | thiolester bond                                          | 6  | 1.5  | 8.22E-04 | 8.03467  | 0.009948 |
| GOTERM_BP_FAT   | GO:0042110~T cell activation                             | 13 | 3.25 | 9.49E-05 | 4.010764 | 0.009956 |
| SP_PIR_KEYWORDS | Spliceosome                                              | 10 | 2.5  | 8.81E-04 | 4.017335 | 0.010332 |
| BIOCARTA        | h_mhcPathway:Antigen Processing and Presentation         | 6  | 1.5  | 7.44E-05 | 11.1974  | 0.012123 |
| GOTERM_BP_FAT   | GO:0042274~ribosomal small subunit biogenesis            | 5  | 1.25 | 1.22E-04 | 17.6698  | 0.012124 |
| SP_PIR_KEYWORDS | acetylated amino end                                     | 9  | 2.25 | 0.001111 | 4.338722 | 0.012282 |
| GOTERM_CC_FAT   | GO:0016469~proton-transporting two-sector ATPase complex | 7  | 1.75 | 9.40E-04 | 6.061924 | 0.012298 |
| SP_PIR_KEYWORDS | lysosome                                                 | 11 | 2.75 | 0.001096 | 3.558981 | 0.012468 |
| GOTERM_CC_FAT   | GO:0016023~cytoplasmic membrane-bounded vesicle          | 28 | 7    | 9.23E-04 | 1.983902 | 0.012551 |
| SP_PIR_KEYWORDS | actin binding                                            | 6  | 1.5  | 0.001341 | 7.231203 | 0.014397 |
| GOTERM_BP_FAT   | GO:0002274~myeloid leukocyte activation                  | 8  | 2    | 1.56E-04 | 6.76062  | 0.014735 |
| GOTERM_BP_FAT   | GO:0002252~immune effector process                       | 13 | 3.25 | 1.71E-04 | 3.771316 | 0.015453 |
| GOTERM_CC_FAT   | GO:0043020~NADPH oxidase complex                         | 4  | 1    | 0.001243 | 17.31978 | 0.015627 |
| SP_PIR_KEYWORDS | surface antigen                                          | 6  | 1.5  | 0.001676 | 6.88686  | 0.017483 |
| GOTERM_CC_FAT   | GO:0033176~proton-transporting V-type ATPase complex     | 5  | 1.25 | 0.001473 | 9.742378 | 0.017844 |
| GOTERM_BP_FAT   | GO:0034622~cellular macromolecular complex assembly      | 21 | 5.25 | 2.11E-04 | 2.567122 | 0.018205 |
| GOTERM_CC_FAT   | GO:0001726~ruffle                                        | 8  | 2    | 0.001569 | 4.653076 | 0.018347 |
| INTERPRO        | IPR003597:Immunoglobulin C1-set                          | 10 | 2.5  | 2.38E-05 | 6.396483 | 0.018868 |
| UP_SEQ_FEATURE  | region of interest:Alpha-1                               | 6  | 1.5  | 4.57E-05 | 14.37068 | 0.0191   |
| UP_SEQ_FEATURE  | region of interest:Alpha-2                               | 6  | 1.5  | 4.57E-05 | 14.37068 | 0.0191   |
| GOTERM_BP_FAT   | GO:0034220~ion transmembrane transport                   | 8  | 2    | 2.34E-04 | 6.346704 | 0.019329 |
| KEGG_PATHWAY    | hsa04670:Leukocyte transendothelial migration            | 14 | 3.5  | 0.001196 | 2.819183 | 0.019631 |
| KEGG_PATHWAY    | hsa04514:Cell adhesion molecules (CAMs)                  | 15 | 3.75 | 0.001136 | 2.700191 | 0.021735 |
| GOTERM_CC_FAT   | GO:0048770~pigment granule                               | 9  | 2.25 | 0.001969 | 3.940737 | 0.022216 |
| GOTERM_CC_FAT   | GO:0042470~melanosome                                    | 9  | 2.25 | 0.001969 | 3.940737 | 0.022216 |
| GOTERM_BP_FAT   | GO:0006916~anti-apoptosis                                | 16 | 4    | 2.82E-04 | 3.019306 | 0.022319 |
| SP_PIR_KEYWORDS | chronic granulomatous disease                            | 3  | 0.75 | 0.002493 | 36.15602 | 0.025226 |
| GOTERM_BP_FAT   | GO:0002443~leukocyte mediated immunity                   | 10 | 2.5  | 3.50E-04 | 4.520182 | 0.026658 |
| GOTERM_MF_FAT   | GO:0003729~mRNA binding                                  | 9  | 2.25 | 2.93E-04 | 5.237897 | 0.026833 |
| GOTERM_BP_FAT   | GO:0002684~positive regulation of immune system process  | 17 | 4.25 | 4.36E-04 | 2.776683 | 0.029675 |

|                 |                                                                                              |    |       |          |          |          |
|-----------------|----------------------------------------------------------------------------------------------|----|-------|----------|----------|----------|
| KEGG_PATHWAY    | hsa05110:Vibrio cholerae infection                                                           | 9  | 2.25  | 0.00208  | 3.818842 | 0.029738 |
|                 | GO:0032956~regulation of actin cytoskeleton organization                                     | 10 | 2.5   | 4.53E-04 | 4.367816 | 0.029812 |
| GOTERM_BP_FAT   | GO:0008219~cell death                                                                        | 35 | 8.75  | 4.26E-04 | 1.892315 | 0.030019 |
| GOTERM_BP_FAT   | GO:0016265~death                                                                             | 35 | 8.75  | 4.74E-04 | 1.879247 | 0.030196 |
|                 | GO:0043122~regulation of I-kappaB kinase/NF-kappaB cascade                                   | 11 | 2.75  | 4.19E-04 | 3.996348 | 0.030655 |
| GOTERM_BP_FAT   | GO:0005887~integral to plasma membrane                                                       | 47 | 11.75 | 0.002829 | 1.541723 | 0.030773 |
|                 | GO:0015985~energy coupled proton transport, down electrochemical gradient                    | 7  | 1.75  | 5.01E-04 | 6.802874 | 0.0309   |
| GOTERM_BP_FAT   | GO:0015986~ATP synthesis coupled proton transport                                            | 7  | 1.75  | 5.01E-04 | 6.802874 | 0.0309   |
|                 | GO:0033177~proton-transporting two-sector ATPase complex, proton-transporting domain         | 5  | 1.25  | 0.002981 | 8.118648 | 0.0314   |
| GOTERM_CC_FAT   | GO:0003924~GTPase activity                                                                   | 16 | 4     | 4.07E-04 | 2.912701 | 0.031825 |
| GOTERM_MF_FAT   | GO:0022604~regulation of cell morphogenesis                                                  | 12 | 3     | 5.51E-04 | 3.560937 | 0.03291  |
| GOTERM_BP_FAT   | GO:0032970~regulation of actin filament-based process                                        | 10 | 2.5   | 5.79E-04 | 4.225387 | 0.033556 |
| GOTERM_BP_FAT   | GO:0050900~leukocyte migration                                                               | 8  | 2     | 6.04E-04 | 5.455939 | 0.033984 |
|                 | h_neutrophilPathway:Neutrophil and Its Surface Molecules                                     | 5  | 1.25  | 4.31E-04 | 11.66396 | 0.034724 |
| BIOCARTA        | GO:0007159~leukocyte adhesion                                                                | 6  | 1.5   | 6.52E-04 | 8.330049 | 0.035658 |
| GOTERM_BP_FAT   | SP_PIR_KEYWORDS mhc ii                                                                       | 5  | 1.25  | 0.003652 | 7.775487 | 0.035832 |
| GOTERM_CC_FAT   | GO:0009986~cell surface                                                                      | 19 | 4.75  | 0.003734 | 2.127646 | 0.03803  |
| UP_SEQ_FEATURE  | region of interest:Connecting peptide                                                        | 7  | 1.75  | 1.23E-04 | 8.8241   | 0.038248 |
| KEGG_PATHWAY    | hsa05330:Allograft rejection                                                                 | 7  | 1.75  | 0.003417 | 4.620327 | 0.038922 |
| SP_PIR_KEYWORDS | polyprotein                                                                                  | 3  | 0.75  | 0.004098 | 28.92481 | 0.039145 |
| GOTERM_BP_FAT   | GO:0006954~inflammatory response                                                             | 20 | 5     | 7.45E-04 | 2.392219 | 0.039552 |
| GOTERM_CC_FAT   | GO:0031410~cytoplasmic vesicle                                                               | 29 | 7.25  | 0.004137 | 1.760305 | 0.040838 |
| GOTERM_CC_FAT   | GO:0031226~intrinsic to plasma membrane                                                      | 47 | 11.75 | 0.004401 | 1.507463 | 0.042183 |
| KEGG_PATHWAY    | hsa04142:Lysosome                                                                            | 13 | 3.25  | 0.003369 | 2.640187 | 0.042561 |
|                 | GO:0002495~antigen processing and presentation of peptide antigen via MHC class II           | 4  | 1     | 8.51E-04 | 19.43678 | 0.042819 |
| GOTERM_BP_FAT   | GO:0019886~antigen processing and presentation of exogenous peptide antigen via MHC class II | 4  | 1     | 8.51E-04 | 19.43678 | 0.042819 |

|                 |                                                                   |    |      |          |          |          |
|-----------------|-------------------------------------------------------------------|----|------|----------|----------|----------|
| GOTERM_BP_FAT   | GO:0034097~response to cytokine stimulus                          | 9  | 2.25 | 9.24E-04 | 4.428634 | 0.043168 |
| GOTERM_BP_FAT   | GO:0008064~regulation of actin polymerization or depolymerization | 8  | 2    | 9.13E-04 | 5.098172 | 0.043651 |
| GOTERM_BP_FAT   | GO:0015992~proton transport                                       | 8  | 2    | 9.13E-04 | 5.098172 | 0.043651 |
| GOTERM_MF_FAT   | GO:0005200~structural constituent of cytoskeleton                 | 9  | 2.25 | 6.44E-04 | 4.671638 | 0.043758 |
| GOTERM_BP_FAT   | GO:0006915~apoptosis                                              | 30 | 7.5  | 8.50E-04 | 1.937221 | 0.043872 |
| GOTERM_BP_FAT   | GO:0016192~vesicle-mediated transport                             | 29 | 7.25 | 8.99E-04 | 1.957176 | 0.044079 |
| GOTERM_CC_FAT   | GO:0042612~MHC class I protein complex                            | 5  | 1.25 | 0.005301 | 6.958841 | 0.045537 |
| GOTERM_CC_FAT   | GO:0031967~organelle envelope                                     | 28 | 7    | 0.004936 | 1.759913 | 0.045917 |
| GOTERM_CC_FAT   | GO:0044448~cell cortex part                                       | 8  | 2    | 0.005298 | 3.756098 | 0.046682 |
| GOTERM_CC_FAT   | GO:0031975~envelope                                               | 28 | 7    | 0.005206 | 1.754255 | 0.047105 |
| SP_PIR_KEYWORDS | membrane protein                                                  | 7  | 1.75 | 0.00521  | 4.382547 | 0.04723  |
| SP_PIR_KEYWORDS | proteoglycan                                                      | 6  | 1.5  | 0.005093 | 5.356447 | 0.047289 |
| GOTERM_BP_FAT   | GO:0012501~programmed cell death                                  | 30 | 7.5  | 0.001065 | 1.908686 | 0.048433 |
| GOTERM_BP_FAT   | GO:0006818~hydrogen transport                                     | 8  | 2    | 0.001108 | 4.936325 | 0.04924  |
| GOTERM_BP_FAT   | GO:0030832~regulation of actin filament length                    | 8  | 2    | 0.001108 | 4.936325 | 0.04924  |

**Supplemental Table 5. LincRNAs highly expressed in whole blood (36 lincRNAs with log<sub>2</sub> (FPKM) > 1 in all samples)**

| gene_id         | gene_short_name | locus                 | gene_biotype |
|-----------------|-----------------|-----------------------|--------------|
| ENSG00000172965 | MIR4435-1HG     | 2:111953926-112252677 | lincRNA      |
| ENSG00000188971 | RP11-427H3.3    | 2:69685128-69693664   | lincRNA      |
| ENSG00000204261 | TAPSAR1         | 6:32811862-32814272   | lincRNA      |
| ENSG00000214837 | RP11-261C10.3   | 1:243242158-243265035 | lincRNA      |
| ENSG00000222041 | LINC00152       | 2:87754886-87906324   | lincRNA      |
| ENSG00000223804 | RP6-206I17.1    | 1:143647637-143745417 | lincRNA      |
| ENSG00000224397 | RP11-290F20.3   | 20:48884022-48896332  | lincRNA      |
| ENSG00000225484 | RP11-773D16.1   | 10:81563812-81586350  | lincRNA      |
| ENSG00000226328 | CTA-217C2.1     | 22:45528900-45559662  | lincRNA      |



|                 |               |                       |         |
|-----------------|---------------|-----------------------|---------|
| ENSG00000228327 | RP11-206L10.2 | 1:700236-714006       | lincRNA |
| ENSG00000230590 | FTX           | X:73183789-73513409   | lincRNA |
| ENSG00000230724 | LINC01001     | 11:127114-139612      | lincRNA |
| ENSG00000233013 | FAM157B       | 9:141106636-141143444 | lincRNA |
| ENSG00000235398 | LINC00623     | 1:144299757-144341756 | lincRNA |
| ENSG00000236438 | FAM157A       | 3:197879236-197925886 | lincRNA |
| ENSG00000237094 | RP4-669L17.10 | 1:317719-453948       | lincRNA |
| ENSG00000237943 | PRKCQ-AS1     | 10:6622380-6633059    | lincRNA |
| ENSG00000238035 | AC138035.2    | 5:180733502-180755068 | lincRNA |
| ENSG00000238113 | RP11-262H14.1 | 9:66457284-66469310   | lincRNA |
| ENSG00000240618 | RP11-206L10.5 | 1:694411-700305       | lincRNA |
| ENSG00000241163 | LINC00877     | 3:72084450-72291716   | lincRNA |
| ENSG00000244625 | CTA-211A9.5   | 22:27068729-27176170  | lincRNA |
| ENSG00000245164 | LINC00861     | 8:126934551-126963493 | lincRNA |
| ENSG00000246067 | RAB30-AS1     | 11:82783107-82817761  | lincRNA |
| ENSG00000248323 | LUCAT1        | 5:90598845-90610219   | lincRNA |
| ENSG00000259758 | CASC7         | 8:141530254-141539600 | lincRNA |
| ENSG00000260032 | LINC00657     | 20:34633543-34638882  | lincRNA |
| ENSG00000261804 | RP11-44F14.2  | 16:53407404-53418657  | lincRNA |
| ENSG00000262370 | RP11-473M20.9 | 16:3126911-3137101    | lincRNA |
| ENSG00000264112 | RP11-159D12.2 | 17:56066399-56072211  | lincRNA |
| ENSG00000267427 | CTC-503J8.6   | 19:6210389-6212492    | lincRNA |
| ENSG00000269614 | RP11-277L2.5  | 1:149587501-149587988 | lincRNA |
| ENSG00000269640 | CTD-2521M24.9 | 19:17516502-17529713  | lincRNA |
| ENSG00000269900 | RMRP          | 9:35657747-35658015   | lincRNA |
| ENSG00000270949 | RP11-288H12.4 | 6:160529405-160532536 | lincRNA |
| ENSG00000271204 | RP11-138A9.1  | 7:130614967-130616965 | lincRNA |

**Supplemental Table 6. Results of adjusting for additional 9 clinical covariates for 68 coding gene and 2 lincRNA signatures identified by Model 1.**

| gene_name     | locus                  | gene_biotype   | BaseMean | Model 1: adjusted for sex, batch,<br>and two SVs |                 |                 | Model 2: adjusted for<br>additional 9 covariates |                 |                 |
|---------------|------------------------|----------------|----------|--------------------------------------------------|-----------------|-----------------|--------------------------------------------------|-----------------|-----------------|
|               |                        |                |          | log2FD                                           | pvalue          | padj.BH         | log2FD                                           | pvalue          | padj.BH         |
| <b>APOD</b>   | 3:195295572-195311076  | protein_coding | 301      | <b>-0.194</b>                                    | <b>1.29E-06</b> | <b>7.54E-03</b> | <b>-0.233</b>                                    | <b>4.64E-07</b> | <b>2.80E-03</b> |
| <b>DUS1L</b>  | 17:80015381-80023763   | protein_coding | 902      | <b>0.411</b>                                     | <b>1.97E-06</b> | <b>7.54E-03</b> | <b>0.488</b>                                     | <b>1.67E-07</b> | <b>2.02E-03</b> |
| <b>AFF3</b>   | 2:100162322-100759201  | protein_coding | 1478     | <b>-0.444</b>                                    | <b>2.12E-06</b> | <b>7.54E-03</b> | <b>-0.427</b>                                    | <b>1.32E-05</b> | <b>4.74E-02</b> |
| <b>IRF7</b>   | 11:612552-615999       | protein_coding | 1652     | <b>0.414</b>                                     | <b>2.50E-06</b> | <b>7.54E-03</b> | <b>0.382</b>                                     | <b>5.19E-05</b> | <b>7.15E-02</b> |
| IPO5          | 13:98605911-98676551   | protein_coding | 1866     | -0.321                                           | 3.75E-06        | 9.05E-03        | -0.281                                           | 3.43E-04        | 1.50E-01        |
| SH3PXD2A      | 10:105348284-105615301 | protein_coding | 927      | -0.405                                           | 5.93E-06        | 1.19E-02        | -0.318                                           | 8.23E-04        | 2.07E-01        |
| BACH2         | 6:90636247-91006627    | protein_coding | 3905     | -0.368                                           | 1.09E-05        | 1.88E-02        | -0.310                                           | 6.97E-04        | 2.04E-01        |
| PAX5          | 9:36833271-37034103    | protein_coding | 1406     | -0.408                                           | 1.67E-05        | 2.52E-02        | -0.354                                           | 3.06E-04        | 1.50E-01        |
| PHF6          | X:133507282-133562820  | protein_coding | 704      | -0.328                                           | 1.99E-05        | 2.67E-02        | -0.317                                           | 2.20E-04        | 1.44E-01        |
| FCRL2         | 1:157715522-157746922  | protein_coding | 868      | -0.401                                           | 2.26E-05        | 2.72E-02        | -0.349                                           | 3.47E-04        | 1.50E-01        |
| VEZT          | 12:95611521-95696566   | protein_coding | 1024     | -0.321                                           | 2.97E-05        | 3.01E-02        | -0.287                                           | 7.96E-04        | 2.04E-01        |
| <b>TRIM46</b> | 1:155145872-155157447  | protein_coding | 159      | 0.390                                            | 3.52E-05        | 3.01E-02        | 0.415                                            | 1.97E-05        | <b>4.74E-02</b> |
| IFI6          | 1:27992571-27998729    | protein_coding | 1711     | 0.390                                            | 3.60E-05        | 3.01E-02        | 0.377                                            | 1.14E-04        | 1.20E-01        |
| RAD52         | 12:1021242-1099219     | protein_coding | 1090     | -0.302                                           | 3.75E-05        | 3.01E-02        | -0.284                                           | 5.90E-04        | 1.92E-01        |
| BLK           | 8:11351509-11422113    | protein_coding | 562      | -0.390                                           | 3.87E-05        | 3.01E-02        | -0.334                                           | 6.87E-04        | 2.04E-01        |
| HLA-F         | 6:29690551-29706305    | protein_coding | 5562     | 0.267                                            | 3.99E-05        | 3.01E-02        | 0.279                                            | 1.93E-04        | 1.44E-01        |
| <b>IFI27</b>  | 14:94571181-94583033   | protein_coding | 170      | 0.318                                            | 4.54E-05        | 3.06E-02        | 0.340                                            | 4.48E-05        | <b>7.15E-02</b> |
| HNRNPR        | 1:23630263-23670829    | protein_coding | 2946     | -0.260                                           | 4.56E-05        | 3.06E-02        | -0.223                                           | 2.30E-03        | 3.06E-01        |
| ZNF44         | 19:12335500-12405702   | protein_coding | 671      | -0.301                                           | 5.16E-05        | 3.19E-02        | -0.257                                           | 2.05E-03        | 2.91E-01        |
| FCER2         | 19:7753643-7767032     | protein_coding | 592      | -0.379                                           | 5.29E-05        | 3.19E-02        | -0.312                                           | 1.35E-03        | 2.48E-01        |
| FRS2          | 12:69864128-69973562   | protein_coding | 1778     | -0.256                                           | 5.88E-05        | 3.28E-02        | -0.236                                           | 1.35E-03        | 2.48E-01        |
| <b>HBG1</b>   | 11:5269312-5271122     | protein_coding | 17515    | 0.346                                            | 5.98E-05        | 3.28E-02        | 0.389                                            | 1.75E-05        | <b>4.74E-02</b> |
| PRKDC         | 8:48685668-48872743    | protein_coding | 9155     | -0.215                                           | 6.59E-05        | 3.37E-02        | -0.246                                           | 1.19E-04        | 1.20E-01        |
| MS4A1         | 11:60223224-60238233   | protein_coding | 3170     | -0.375                                           | 6.91E-05        | 3.37E-02        | -0.332                                           | 7.28E-04        | 2.04E-01        |

|             |                       |                |       |        |          |          |        |          |                 |
|-------------|-----------------------|----------------|-------|--------|----------|----------|--------|----------|-----------------|
| FCRLA       | 1:161676761-161684142 | protein_coding | 562   | -0.372 | 6.98E-05 | 3.37E-02 | -0.337 | 5.07E-04 | 1.82E-01        |
| ACADVL      | 17:7120443-7128592    | protein_coding | 3648  | 0.263  | 8.06E-05 | 3.70E-02 | 0.247  | 1.15E-03 | 2.41E-01        |
| CCDC141     | 2:179694483-179914813 | protein_coding | 703   | -0.372 | 8.28E-05 | 3.70E-02 | -0.306 | 1.90E-03 | 2.87E-01        |
| <b>HBG2</b> | 11:5274419-5667019    | protein_coding | 39577 | 0.327  | 9.13E-05 | 3.93E-02 | 0.370  | 2.78E-05 | <b>5.59E-02</b> |
| SKIL        | 3:170075465-170114623 | protein_coding | 1570  | -0.252 | 9.53E-05 | 3.96E-02 | -0.203 | 5.29E-03 | 3.45E-01        |
| GPT2        | 16:46918289-46965209  | protein_coding | 100   | -0.321 | 1.21E-04 | 4.87E-02 | -0.281 | 1.32E-03 | 2.48E-01        |
| STRBP       | 9:125871778-126030855 | protein_coding | 1034  | -0.337 | 1.38E-04 | 5.37E-02 | -0.282 | 2.84E-03 | 3.16E-01        |
| ZNF445      | 3:44481261-44519162   | protein_coding | 2182  | -0.223 | 1.46E-04 | 5.52E-02 | -0.242 | 4.21E-04 | 1.69E-01        |
| RASGRF1     | 15:79252288-79383115  | protein_coding | 84    | -0.220 | 1.72E-04 | 6.30E-02 | -0.196 | 2.89E-03 | 3.16E-01        |
| FIGNL1      | 7:50511830-50518088   | protein_coding | 234   | -0.351 | 1.80E-04 | 6.39E-02 | -0.360 | 2.40E-04 | 1.44E-01        |
| PRKX        | X:3522410-3631649     | protein_coding | 2556  | -0.252 | 1.89E-04 | 6.52E-02 | -0.206 | 7.62E-03 | 3.71E-01        |
| CLNK        | 4:10488018-10686489   | protein_coding | 96    | -0.288 | 2.03E-04 | 6.70E-02 | -0.237 | 4.80E-03 | 3.38E-01        |
|             | 11:118620033-         |                |       |        |          |          |        |          |                 |
| DDX6        | 118661858             | protein_coding | 10805 | -0.183 | 2.17E-04 | 6.70E-02 | -0.135 | 2.07E-02 | 4.49E-01        |
| DESI2       | 1:244816236-244872335 | protein_coding | 945   | -0.265 | 2.18E-04 | 6.70E-02 | -0.292 | 3.43E-04 | 1.50E-01        |
| NPDC1       | 9:139933921-139940655 | protein_coding | 146   | 0.344  | 2.19E-04 | 6.70E-02 | 0.355  | 2.36E-04 | 1.44E-01        |
| NXF1        | 11:62559594-62573774  | protein_coding | 7228  | 0.164  | 2.22E-04 | 6.70E-02 | 0.197  | 2.06E-04 | 1.44E-01        |
| RNF113A     | X:119004496-119005791 | protein_coding | 297   | 0.335  | 2.60E-04 | 7.37E-02 | 0.363  | 1.92E-04 | 1.44E-01        |
| RARS        | 5:167913449-167946304 | protein_coding | 1359  | -0.274 | 2.65E-04 | 7.37E-02 | -0.160 | 5.52E-02 | 5.36E-01        |
| RHOBTB2     | 8:22844929-22877712   | protein_coding | 558   | -0.335 | 2.66E-04 | 7.37E-02 | -0.335 | 5.42E-04 | 1.82E-01        |
| UGGT1       | 2:128848773-128953251 | protein_coding | 4889  | -0.181 | 2.69E-04 | 7.37E-02 | -0.185 | 1.51E-03 | 2.48E-01        |
| ISG15       | 1:948802-949920       | protein_coding | 635   | 0.336  | 2.81E-04 | 7.52E-02 | 0.349  | 2.60E-04 | 1.44E-01        |
| TIPARP      | 3:156391023-156424559 | protein_coding | 938   | -0.261 | 2.87E-04 | 7.52E-02 | -0.278 | 4.96E-04 | 1.82E-01        |
|             | 12:117890816-         |                |       |        |          |          |        |          |                 |
| KSR2        | 118406788             | protein_coding | 98    | -0.153 | 2.95E-04 | 7.57E-02 | -0.173 | 3.74E-04 | 1.55E-01        |
| ATP6V0D1    | 16:67471916-67515140  | protein_coding | 8907  | 0.203  | 3.21E-04 | 8.07E-02 | 0.188  | 4.15E-03 | 3.38E-01        |
| FBXO11      | 2:48016454-48132932   | protein_coding | 1609  | -0.228 | 3.35E-04 | 8.11E-02 | -0.255 | 5.24E-04 | 1.82E-01        |
| ZNF274      | 19:58694395-58724928  | protein_coding | 840   | -0.287 | 3.36E-04 | 8.11E-02 | -0.218 | 1.36E-02 | 4.15E-01        |
| MCOLN1      | 19:7587511-7598895    | protein_coding | 1777  | 0.321  | 3.48E-04 | 8.23E-02 | 0.279  | 3.50E-03 | 3.22E-01        |
| DDX24       | 14:94517265-94547591  | protein_coding | 2085  | -0.266 | 3.55E-04 | 8.24E-02 | -0.305 | 2.74E-04 | 1.44E-01        |
| PEX26       | 22:18560688-18613905  | protein_coding | 1308  | -0.265 | 3.69E-04 | 8.35E-02 | -0.263 | 1.54E-03 | 2.48E-01        |
| TBC1D23     | 3:99979843-100044095  | protein_coding | 1794  | -0.218 | 3.74E-04 | 8.35E-02 | -0.173 | 1.49E-02 | 4.21E-01        |
| WNT3        | 17:44839871-44910520  | protein_coding | 137   | -0.237 | 3.94E-04 | 8.58E-02 | -0.240 | 9.18E-04 | 2.26E-01        |

|              |                        |                |      |        |          |          |        |          |                 |
|--------------|------------------------|----------------|------|--------|----------|----------|--------|----------|-----------------|
| RAB30        | 11:82684174-82782965   | protein_coding | 804  | -0.313 | 4.01E-04 | 8.58E-02 | -0.257 | 6.75E-03 | 3.71E-01        |
| ODF3B        | 22:50968138-50971009   | protein_coding | 533  | 0.334  | 4.06E-04 | 8.58E-02 | 0.358  | 2.74E-04 | 1.44E-01        |
| CDK2AP2      | 11:67273967-67276120   | protein_coding | 771  | 0.320  | 4.25E-04 | 8.72E-02 | 0.313  | 1.19E-03 | 2.43E-01        |
| CDKN2D       | 19:10677137-10679735   | protein_coding | 4162 | 0.276  | 4.31E-04 | 8.72E-02 | 0.284  | 1.04E-03 | 2.36E-01        |
| SLC6A16      | 19:49792894-49828482   | protein_coding | 611  | -0.324 | 4.34E-04 | 8.72E-02 | -0.238 | 1.45E-02 | 4.21E-01        |
| MOAP1        | 14:93648540-93651273   | protein_coding | 427  | 0.320  | 4.45E-04 | 8.81E-02 | 0.292  | 2.59E-03 | 3.10E-01        |
| IRF4         | 6:391738-411447        | protein_coding | 1629 | -0.296 | 4.66E-04 | 9.07E-02 | -0.260 | 4.53E-03 | 3.38E-01        |
| S100BPB      | 1:33282367-33324476    | protein_coding | 2679 | -0.231 | 4.81E-04 | 9.13E-02 | -0.155 | 4.07E-02 | 5.05E-01        |
| GPR15        | 3:98250742-98251960    | protein_coding | 181  | 0.282  | 4.84E-04 | 9.13E-02 | 0.266  | 2.04E-03 | 2.91E-01        |
| <b>DNAH7</b> | 2:196602426-196933536  | protein_coding | 151  | -0.326 | 5.15E-04 | 9.39E-02 | -0.392 | 5.33E-05 | <b>7.15E-02</b> |
| TCF20        | 22:42556018-42739622   | protein_coding | 4310 | -0.206 | 5.21E-04 | 9.39E-02 | -0.147 | 3.31E-02 | 4.88E-01        |
| EIF2S3L      | 12:10658200-10675734   | protein_coding | 393  | -0.273 | 5.22E-04 | 9.39E-02 | -0.227 | 9.18E-03 | 3.84E-01        |
| PSMB6        | 17:4699438-4701790     | protein_coding | 615  | 0.315  | 5.61E-04 | 9.95E-02 | 0.271  | 5.23E-03 | 3.45E-01        |
| LINC00452    | 13:114586639-114588308 | lincRNA        | 14   | -1.329 | 1.44E-05 | 4.53E-02 | -1.268 | 8.05E-05 | 2.63E-01        |
| RP11-481J2.2 | 16:58455229-58496374   | lincRNA        | 10   | -1.214 | 6.33E-05 | 9.97E-02 | -1.116 | 4.67E-04 | 3.58E-01        |

#9 clinical covariates are DBP, TC, HDL, smoking, diabetes and treatments for hypertension, lipid, diabetes and aspirin, which are different across MI, high CAC and controls ( $P < 0.05$ , see Table 1).

Model 1: adjusted for sex, batch, and two SVs (results were shown in Table 2)

Model 2: adjusted for additional 9 covariates (9 genes remained significant at  $FDR < 0.1$ )

**Supplemental Table 7. GSEA pathway analysis and leading-edge genes (FDR<0.25 including 215 gene sets are upregulated in phenotype MI, and 8 gene sets are upregulated in controls)**

| <b>NAME in MSigDB</b>                          | <b>SIZE</b> | <b>NES</b> | <b>NOM p-val</b> | <b>FDR q-val</b> |
|------------------------------------------------|-------------|------------|------------------|------------------|
| BOWIE_RESPONSE_TO_EXTRACELLULAR_MATRIX         | 17          | 0.834      | 0.000            | 0.000            |
| DAZARD_UV_RESPONSE_CLUSTER_G4                  | 15          | 0.811      | 0.000            | 0.000            |
| BOWIE_RESPONSE_TO_TAMOXIFEN                    | 18          | 0.800      | 0.000            | 0.000            |
| ZHANG_INTERFERON_RESPONSE                      | 22          | 0.760      | 0.000            | 0.001            |
| BENNETT_SYSTEMIC_LUPUS_ERYTHEMATOSUS           | 30          | 0.730      | 0.000            | 0.002            |
| ZHANG_ANTIVIRAL_RESPONSE_TO_RIBAVIRIN_UP       | 20          | 0.725      | 0.000            | 0.002            |
| CREIGHTON_AKT1_SIGNALING_VIA_MTOR_DN           | 20          | 0.687      | 0.000            | 0.010            |
| UROSEVIC_RESPONSE_TO_IMIQUIMOD                 | 20          | 0.688      | 0.000            | 0.011            |
| STAMBOLSKY_TARGETS_OF_MUTATED_TP53_DN          | 38          | 0.675      | 0.000            | 0.012            |
| CHIBA_RESPONSE_TO_TSA_UP                       | 29          | 0.677      | 0.000            | 0.012            |
| DAZARD_UV_RESPONSE_CLUSTER_G24                 | 15          | 0.681      | 0.002            | 0.012            |
| MOSERLE_IFNA_RESPONSE                          | 29          | 0.671      | 0.000            | 0.014            |
| EINAV_INTERFERON_SIGNATURE_IN_CANCER           | 26          | 0.663      | 0.000            | 0.016            |
| GALE_APL_WITH_FLT3_MUTATED_DN                  | 16          | 0.653      | 0.000            | 0.019            |
| LIANG_SILENCED_BY_METHYLATION_2                | 32          | 0.655      | 0.000            | 0.020            |
| LIANG_HEMATOPOIESIS_STEM_CELL_NUMBER_QTL       | 15          | 0.653      | 0.006            | 0.020            |
| JOSEPH_RESPONSE_TO_SODIUM_BUTYRATE_UP          | 26          | 0.646      | 0.000            | 0.021            |
| REACTOME_TRANSFERRIN_ENDOCYTOSIS_AND_RECYCLING | 19          | 0.647      | 0.000            | 0.021            |
| RASHI_NFKB1_TARGETS                            | 18          | 0.648      | 0.000            | 0.022            |
| CAVARD_LIVER_CANCER_MALIGNANT_VS_BENIGN        | 16          | 0.640      | 0.002            | 0.024            |
| DAUER_STAT3_TARGETS_DN                         | 46          | 0.633      | 0.000            | 0.027            |
| HARRIS_BRAIN_CANCER_PROGENITORS                | 15          | 0.633      | 0.004            | 0.028            |
| KRASNOSELSKAYA_ILF3_TARGETS_UP                 | 28          | 0.633      | 0.000            | 0.029            |
| RADAEVA_RESPONSE_TO_IFNA1_UP                   | 47          | 0.627      | 0.000            | 0.031            |
| KIM_LRRC3B_TARGETS                             | 28          | 0.627      | 0.000            | 0.032            |

|                                                                           |    |       |       |       |
|---------------------------------------------------------------------------|----|-------|-------|-------|
| SUH_COEXPRESSED_WITH_ID1_AND_ID2_UP                                       | 16 | 0.624 | 0.006 | 0.032 |
| NOJIMA_SFRP2_TARGETS_DN                                                   | 18 | 0.621 | 0.002 | 0.034 |
| XU_HGF_TARGETS_INDUCED_BY_AKT1_6HR                                        | 16 | 0.610 | 0.008 | 0.040 |
| BROWNE_INTERFERON_RESPONSIVE_GENES                                        | 63 | 0.610 | 0.000 | 0.040 |
| REACTOME_INTERFERON_ALPHA_BETA_SIGNALING                                  | 46 | 0.611 | 0.000 | 0.041 |
| GRATIAS_RETINOBLASTOMA_16Q24                                              | 15 | 0.611 | 0.008 | 0.041 |
| KANG_CISPLATIN_RESISTANCE_UP                                              | 16 | 0.612 | 0.000 | 0.041 |
| WELCH_GATA1_TARGETS                                                       | 18 | 0.614 | 0.000 | 0.042 |
| OUYANG_PROSTATE_CANCER_PROGRESSION_DN                                     | 16 | 0.612 | 0.004 | 0.042 |
| REACTOME_INSULIN_RECEPTOR_RECYCLING                                       | 17 | 0.602 | 0.000 | 0.049 |
| AMUNDSON_GAMMA_RADIATION_RESPONSE                                         | 23 | 0.598 | 0.002 | 0.052 |
| GNATENKO_PLATELET_SIGNATURE                                               | 43 | 0.592 | 0.000 | 0.057 |
| PID_PRL_SIGNALING_EVENTS_PATHWAY                                          | 20 | 0.592 | 0.000 | 0.057 |
| ZUCCHI_METASTASIS_DN                                                      | 28 | 0.592 | 0.000 | 0.059 |
| GENTILE_UV_LOW_DOSE_UP                                                    | 22 | 0.586 | 0.002 | 0.059 |
| VARELA_ZMPSTE24_TARGETS_UP                                                | 32 | 0.593 | 0.000 | 0.060 |
| REACTOME_LATENT_INFECTION_OF_HOMO_SAPIENS_WITH_MYCOBACTERIUM_TUBERCULOSIS | 23 | 0.585 | 0.004 | 0.060 |
| XU_AKT1_TARGETS_6HR                                                       | 25 | 0.586 | 0.002 | 0.061 |
| NIKOLSKY_BREAST_CANCER_16P13_AMPLICON                                     | 71 | 0.584 | 0.000 | 0.061 |
| HECKER_IFNB1_TARGETS                                                      | 83 | 0.587 | 0.000 | 0.062 |
| GOLUB_ALL_VS_AML_DN                                                       | 21 | 0.588 | 0.000 | 0.062 |
| VALK_AML_CLUSTER_7                                                        | 25 | 0.586 | 0.000 | 0.062 |
| DAZARD_UV_RESPONSE_CLUSTER_G2                                             | 18 | 0.581 | 0.002 | 0.064 |
| SEITZ_NEOPLASTIC_TRANSFORMATION_BY_8P_DELETION_UP                         | 47 | 0.577 | 0.000 | 0.067 |
| SAGIV_CD24_TARGETS_DN                                                     | 30 | 0.578 | 0.000 | 0.067 |
| DIRMEIER_LMP1_RESPONSE_LATE_DN                                            | 28 | 0.578 | 0.002 | 0.068 |
| DELLA_RESPONSE_TO_TSA_AND_BUTYRATE                                        | 19 | 0.576 | 0.010 | 0.068 |
| KIM_HYPOXIA                                                               | 19 | 0.573 | 0.008 | 0.070 |
| VILIMAS_NOTCH1_TARGETS_DN                                                 | 16 | 0.574 | 0.008 | 0.070 |
| IIZUKA_LIVER_CANCER_PROGRESSION_L0_L1_DN                                  | 21 | 0.573 | 0.002 | 0.071 |
| REACTOME_PYRIMIDINE_METABOLISM                                            | 19 | 0.570 | 0.004 | 0.074 |

|                                                     |    |       |       |       |
|-----------------------------------------------------|----|-------|-------|-------|
| CROMER_TUMORIGENESIS_UP                             | 22 | 0.563 | 0.009 | 0.084 |
| CREIGHTON_AKT1_SIGNALING_VIA_MTOR_UP                | 30 | 0.564 | 0.000 | 0.084 |
| NATSUME_RESPONSE_TO_INTERFERON_BETA_DN              | 46 | 0.561 | 0.000 | 0.084 |
| REACTOME_RESPIRATORY_ELECTRON_TRANSPORT             | 61 | 0.560 | 0.000 | 0.084 |
| WENG_POR_TARGETS_LIVER_UP                           | 28 | 0.561 | 0.000 | 0.085 |
| MOOTHA_VOXPHOS                                      | 82 | 0.559 | 0.000 | 0.085 |
| GESERICK_TERT_TARGETS_DN                            | 17 | 0.559 | 0.012 | 0.086 |
| MAHADEVAN_RESPONSE_TO_MP470_DN                      | 15 | 0.558 | 0.035 | 0.086 |
| LEIN_ASTROCYTE_MARKERS                              | 19 | 0.561 | 0.006 | 0.087 |
| CHIANG_LIVER_CANCER_SUBCLASS_INTERFERON_UP          | 17 | 0.555 | 0.016 | 0.091 |
| LU_TUMOR_VASCULATURE_UP                             | 15 | 0.552 | 0.019 | 0.095 |
| SATO_SILENCED_BY_METHYLATION_IN_PANCREATIC_CANCER_2 | 22 | 0.552 | 0.008 | 0.096 |
| MARCHINI TRABECTEDIN_RESISTANCE_UP                  | 17 | 0.549 | 0.010 | 0.101 |
| WESTON_VEGFA_TARGETS_6HR                            | 23 | 0.548 | 0.008 | 0.102 |
| MACLACHLAN_BRCA1_TARGETS_UP                         | 18 | 0.544 | 0.014 | 0.106 |
| SCHURINGA_STAT5A_TARGETS_UP                         | 16 | 0.545 | 0.022 | 0.106 |
| REACTOME_IRON_UPTAKE_AND_TRANSPORT                  | 29 | 0.545 | 0.000 | 0.107 |
| INGA_TP53_TARGETS                                   | 15 | 0.542 | 0.035 | 0.110 |
| REACTOME_BASIGIN_INTERACTIONS                       | 16 | 0.541 | 0.014 | 0.112 |
| TAKAO_RESPONSE_TO_UVB_RADIATION_UP                  | 82 | 0.540 | 0.000 | 0.113 |
| MATZUK_CENTRAL_FOR_FEMALE_FERTILITY                 | 15 | 0.538 | 0.036 | 0.114 |
| ZHAN_MULTIPLE_MYELOMA_LB_DN                         | 34 | 0.538 | 0.000 | 0.115 |
| ZHAN_V1_LATE_DIFFERENTIATION_GENES_UP               | 30 | 0.538 | 0.002 | 0.115 |
| BAUS_TFF2_TARGETS_UP                                | 22 | 0.532 | 0.010 | 0.118 |
| URS_ADIPOCYTE_DIFFERENTIATION_DN                    | 15 | 0.532 | 0.041 | 0.118 |
| GROSS_ELK3_TARGETS_DN                               | 24 | 0.533 | 0.013 | 0.119 |
| DER_IFN_ALPHA_RESPONSE_UP                           | 67 | 0.534 | 0.000 | 0.119 |
| MIZUSHIMA_AUTOPHAGOSOME_FORMATION                   | 18 | 0.535 | 0.029 | 0.120 |
| ZHU_CMV_8_HR_UP                                     | 40 | 0.533 | 0.000 | 0.120 |
| BECKER_TAMOXIFEN_RESISTANCE_UP                      | 33 | 0.533 | 0.000 | 0.120 |
| VALK_AML_CLUSTER_5                                  | 33 | 0.535 | 0.002 | 0.121 |

|                                                                                                                            |     |       |       |       |
|----------------------------------------------------------------------------------------------------------------------------|-----|-------|-------|-------|
| PID_ARF_3PATHWAY                                                                                                           | 19  | 0.533 | 0.014 | 0.121 |
| REACTOME_RIP_MEDIATED_NFKB_ACTIVATION_VIA_DAI                                                                              | 16  | 0.529 | 0.030 | 0.124 |
| HOUSTIS_ROS                                                                                                                | 30  | 0.528 | 0.000 | 0.124 |
| GERHOLD_ADIPOGENESIS_UP                                                                                                    | 36  | 0.528 | 0.000 | 0.125 |
| FARMER_BREAST_CANCER_CLUSTER_1                                                                                             | 39  | 0.526 | 0.002 | 0.130 |
| REACTOME_RESPIRATORY_ELECTRON_TRANSPORT_ATP_SYNTHESIS_BY_CHEMIOSMOTIC_COUPLING_AND_HEAT_PRODUCTION_BY_UNCOUPLING_PROTEINS_ | 76  | 0.524 | 0.000 | 0.135 |
| KEGG_OXIDATIVE_PHOSPHORYLATION                                                                                             | 100 | 0.522 | 0.000 | 0.136 |
| SANA_TNF_SIGNALING_UP                                                                                                      | 57  | 0.522 | 0.000 | 0.137 |
| JECHLINGER_EPITHELIAL_TO_MESENCHYMAL_TRANSITION_UP                                                                         | 44  | 0.521 | 0.000 | 0.138 |
| KIM_ALL_DISORDERS_CALB1_CORR_DN                                                                                            | 21  | 0.519 | 0.000 | 0.138 |
| OKAWA_NEUROBLASTOMA_1P36_31_DELETION                                                                                       | 17  | 0.521 | 0.042 | 0.139 |
| MAGRANGEAS_MULTIPLE_MYELOMA_IGG_VS_IGA_DN                                                                                  | 19  | 0.520 | 0.034 | 0.139 |
| KEGG_FRUCTOSE_AND_MANNOSE_METABOLISM                                                                                       | 28  | 0.519 | 0.004 | 0.139 |
| VERRECCHIA_RESPONSE_TO_TGFB1_C2                                                                                            | 16  | 0.518 | 0.040 | 0.140 |
| VALK_AML_CLUSTER_8                                                                                                         | 25  | 0.516 | 0.002 | 0.145 |
| WANG_CLASSIC_ADIPOGENIC_TARGETS_OF_PPARG                                                                                   | 17  | 0.515 | 0.037 | 0.148 |
| KIM_PTEN_TARGETS_UP                                                                                                        | 15  | 0.514 | 0.052 | 0.150 |
| GILDEA_METASTASIS                                                                                                          | 18  | 0.512 | 0.042 | 0.150 |
| SHIN_B_CELL_LYMPHOMA_CLUSTER_3                                                                                             | 23  | 0.513 | 0.006 | 0.150 |
| OHGUCHI_LIVER_HNF4A_TARGETS_UP                                                                                             | 25  | 0.512 | 0.008 | 0.151 |
| CHANDRAN_METASTASIS_TOP50_DN                                                                                               | 39  | 0.510 | 0.000 | 0.153 |
| REACTOME_CHOLESTEROL_BIOSYNTHESIS                                                                                          | 19  | 0.509 | 0.019 | 0.153 |
| AMIT_EGF_RESPONSE_60_MCF10A                                                                                                | 25  | 0.510 | 0.014 | 0.153 |
| FUJII_YBX1_TARGETS_UP                                                                                                      | 28  | 0.510 | 0.002 | 0.154 |
| SEMENZA_HIF1_TARGETS                                                                                                       | 25  | 0.508 | 0.012 | 0.155 |
| KEGG_REGULATION_OF_AUTOPHAGY                                                                                               | 19  | 0.507 | 0.016 | 0.155 |
| NAKAMURA_ADIPOGENESIS_LATE_DN                                                                                              | 20  | 0.507 | 0.025 | 0.156 |
| HAHTOLA_MYCOSIS_FUNGOIDES_UP                                                                                               | 17  | 0.508 | 0.045 | 0.157 |
| REACTOME_SEMA4D_INDUCED_CELL_MIGRATION_AND_GROWTH_CONE_COLLAPSE                                                            | 21  | 0.506 | 0.016 | 0.158 |
| MARTINEZ_RESPONSE_TO_TRABECTEDIN_UP                                                                                        | 56  | 0.503 | 0.002 | 0.166 |



|                                                                 |    |       |       |       |
|-----------------------------------------------------------------|----|-------|-------|-------|
| SCHLESINGER_METHYLATED_DE_NOVO_IN_CANCER                        | 27 | 0.501 | 0.004 | 0.171 |
| PID_TOLL_ENDOGENOUS_PATHWAY                                     | 21 | 0.491 | 0.024 | 0.174 |
| NADLER_OBESITY_UP                                               | 48 | 0.500 | 0.000 | 0.175 |
| KEGG_PARKINSONS_DISEASE                                         | 97 | 0.491 | 0.000 | 0.175 |
| BARRIER_COLON_CANCER_RECURRENCE_DN                              | 17 | 0.500 | 0.062 | 0.175 |
| CHIBA_RESPONSE_TO_TSA                                           | 39 | 0.488 | 0.002 | 0.175 |
| WUNDER_INFLAMMATORY_RESPONSE_AND_CHOLESTEROL_UP                 | 44 | 0.491 | 0.000 | 0.176 |
| WANG_METASTASIS_OF_BREAST_CANCER_ESR1_UP                        | 19 | 0.488 | 0.056 | 0.176 |
| SATO_SILENCED_BY_DEACETYLATION_IN_PANCREATIC_CANCER             | 23 | 0.488 | 0.023 | 0.176 |
| TAVOR_CEBPA_TARGETS_DN                                          | 26 | 0.498 | 0.014 | 0.176 |
| SAKAI_CHRONIC_HEPATITIS_VS_LIVER_CANCER_DN                      | 21 | 0.491 | 0.031 | 0.176 |
| ABE_VEGFA_TARGETS_2HR                                           | 21 | 0.489 | 0.054 | 0.176 |
| REACTOME_G_PROTEIN_BETA_GAMMA_SIGNALLING                        | 21 | 0.492 | 0.046 | 0.177 |
| INGRAM_SHH_TARGETS_DN                                           | 39 | 0.490 | 0.000 | 0.177 |
| REACTOME_AMYLOIDS                                               | 43 | 0.492 | 0.002 | 0.177 |
| MOOTHA_TCA                                                      | 16 | 0.498 | 0.064 | 0.177 |
| KASLER_HDAC7_TARGETS_2_DN                                       | 22 | 0.497 | 0.008 | 0.178 |
| BIOCARTA_CELLCYCLE_PATHWAY                                      | 16 | 0.489 | 0.080 | 0.178 |
| GALINDO_IMMUNE_RESPONSE_TO_ENTEROTOXIN                          | 74 | 0.489 | 0.000 | 0.178 |
| BOYVAULT_LIVER_CANCER_SUBCLASS_G3_DN                            | 34 | 0.497 | 0.000 | 0.178 |
| RHODES_UNDIFFERENTIATED_CANCER                                  | 52 | 0.492 | 0.000 | 0.178 |
| REACTOME_ACTIVATION_OF_KAINATE_RECEPTORS_UPON_Glutamate_BINDING | 20 | 0.490 | 0.034 | 0.178 |
| REACTOME_FORMATION_OF_TUBULIN_FOLDING_INTERMEDIATES_BY_CCT_TRIC | 17 | 0.493 | 0.062 | 0.179 |
| DASU_IL6_SIGNALING_UP                                           | 43 | 0.492 | 0.000 | 0.179 |
| BANDRES_RESPONSE_TO_CARMUSTIN_MGMT_24HR_DN                      | 16 | 0.497 | 0.063 | 0.179 |
| LIANG_HEMATOPOIESIS_STEM_CELL_NUMBER_SMALL_VS_HUGE_DN           | 27 | 0.493 | 0.004 | 0.179 |
| KEGG_DRUG_METABOLISM_OTHER_ENZYMES                              | 23 | 0.494 | 0.014 | 0.179 |
| WANG_BARRETTES_ESOPHAGUS_AND_ESOPHAGUS_CANCER_DN                | 19 | 0.496 | 0.035 | 0.180 |
| WHITE_NEUROBLASTOMA_WITH_1P36.3_DELETION                        | 16 | 0.492 | 0.054 | 0.180 |
| SASAI_RESISTANCE_TO_NEOPLASTIC_TRANSFORMATION                   | 31 | 0.495 | 0.014 | 0.180 |
| GRAHAM_CML_QUIESCENT_VS_NORMAL_QUIESCENT_UP                     | 64 | 0.494 | 0.000 | 0.180 |

|                                                          |     |       |       |       |
|----------------------------------------------------------|-----|-------|-------|-------|
| REACTOME_PURINE_METABOLISM                               | 27  | 0.496 | 0.010 | 0.181 |
| ZHOU_TNF_SIGNALING_30MIN                                 | 46  | 0.494 | 0.000 | 0.181 |
| SESTO_RESPONSE_TO_UV_C4                                  | 16  | 0.495 | 0.055 | 0.181 |
| BIOCARTA_NFKB_PATHWAY                                    | 20  | 0.485 | 0.031 | 0.182 |
| KIM_GGIS2_TARGETS_UP                                     | 49  | 0.485 | 0.002 | 0.182 |
| BRACHAT_RESPONSE_TO_CAMPTOTHECIN_UP                      | 22  | 0.485 | 0.025 | 0.182 |
| GRADE_METASTASIS_DN                                      | 41  | 0.486 | 0.006 | 0.183 |
| SCIBETTA_KDM5B_TARGETS_UP                                | 17  | 0.484 | 0.053 | 0.184 |
| LI_LUNG_CANCER                                           | 28  | 0.483 | 0.004 | 0.187 |
| BOSCO_INTERFERON_INDUCED_ANTIVIRAL_MODULE                | 68  | 0.481 | 0.000 | 0.191 |
| JOHNSTONE_PARVB_TARGETS_2_UP                             | 114 | 0.481 | 0.000 | 0.191 |
| KYNG_RESPONSE_TO_H2O2_VIA_ERCC6                          | 16  | 0.479 | 0.085 | 0.197 |
| KEGG_ARACHIDONIC_ACID_METABOLISM                         | 27  | 0.478 | 0.010 | 0.200 |
| KEGG_CARDIAC_MUSCLE_CONTRACTION                          | 44  | 0.477 | 0.002 | 0.200 |
| REACTOME_ER_PHAGOSOME_PATHWAY                            | 57  | 0.477 | 0.000 | 0.201 |
| PID_IL8_CXCR1_PATHWAY                                    | 25  | 0.476 | 0.016 | 0.201 |
| LEONARD_HYPOXIA                                          | 38  | 0.477 | 0.002 | 0.202 |
| LEE_LIVER_CANCER                                         | 15  | 0.475 | 0.084 | 0.204 |
| REACTOME_AMINO_ACID_TRANSPORT_ACROSS_THE_PLASMA_MEMBRANE | 19  | 0.474 | 0.048 | 0.208 |
| LI_DCP2_BOUND_MRNA                                       | 82  | 0.474 | 0.000 | 0.208 |
| HASLINGER_B_CLL_WITH_17P13_DELETION                      | 20  | 0.473 | 0.070 | 0.211 |
| PLASARI_TGFB1_SIGNALING_VIA_NFIC_10HR_DN                 | 19  | 0.472 | 0.043 | 0.211 |
| HALMOS_CEBPA_TARGETS_DN                                  | 21  | 0.472 | 0.045 | 0.211 |
| HONMA_DOCETAXEL_RESISTANCE                               | 33  | 0.472 | 0.008 | 0.211 |
| FRIDMAN_SENESCENCE_UP                                    | 57  | 0.470 | 0.000 | 0.212 |
| KONDO_COLON_CANCER_HCP_WITH_H3K27ME1                     | 15  | 0.470 | 0.118 | 0.213 |
| MARKEY_RB1_CHRONIC_LOF_DN                                | 73  | 0.471 | 0.000 | 0.213 |
| REACTOME_ANTIGEN_PROCESSING_CROSS_PRESENTATION           | 69  | 0.469 | 0.000 | 0.215 |
| RICKMAN_METASTASIS_DN                                    | 194 | 0.468 | 0.000 | 0.216 |
| KEGG_GLYCOSAMINOGLYCAN_DEGRADATION                       | 17  | 0.468 | 0.067 | 0.217 |
| ICHIHA_GRAFT_VERSUS_HOST_DISEASE_D7_UP                   | 83  | 0.469 | 0.000 | 0.217 |

|                                                                                                          |     |       |       |       |
|----------------------------------------------------------------------------------------------------------|-----|-------|-------|-------|
| REACTOME_GLYCOPHINGOLIPID_METABOLISM                                                                     | 26  | 0.467 | 0.030 | 0.218 |
| ELVIDGE_HYPOXIA_BY_DMOG_DN                                                                               | 44  | 0.467 | 0.004 | 0.219 |
| YAN_ESCAPE_FROM_ANOIKIS                                                                                  | 16  | 0.467 | 0.102 | 0.220 |
| CHEN_LVAD_SUPPORT_OF_FAILING_HEART_DN                                                                    | 22  | 0.466 | 0.045 | 0.221 |
| PID_SYNDECAN_1_PATHWAY                                                                                   | 22  | 0.465 | 0.044 | 0.223 |
| NEMETH_INFLAMMATORY_RESPONSE_LPS_UP                                                                      | 82  | 0.464 | 0.000 | 0.223 |
| NIKOLSKY_BREAST_CANCER_1Q21_AMPLICON                                                                     | 30  | 0.464 | 0.010 | 0.224 |
| PARK_TRETINOIN_RESPONSE_AND_RARA_PLZF_FUSION                                                             | 19  | 0.464 | 0.057 | 0.224 |
| YAO_TEMPORAL_RESPONSE_TO_PROGESTERONE_CLUSTER_9                                                          | 53  | 0.464 | 0.000 | 0.225 |
| MISSIAGLIA_REGULATED_BY_METHYLATION_UP                                                                   | 99  | 0.463 | 0.000 | 0.226 |
| REACTOME_REGULATION_OF_ORNITHINE_DECARBOXYLASE_ODC                                                       | 46  | 0.462 | 0.004 | 0.227 |
| REACTOME_NEF_MEDIATES_DOWN_MODULATION_OF_CELL_SURFACE_RECEPTORS_BY_RECRUITIN_G_THEM_TO_CLATHRIN_ADAPTERS | 18  | 0.462 | 0.039 | 0.227 |
| SHIN_B_CELL_LYMPHOMA_CLUSTER_8                                                                           | 30  | 0.462 | 0.010 | 0.228 |
| ENK_UV_RESPONSE_KERATINOCYTE_UP                                                                          | 402 | 0.462 | 0.000 | 0.229 |
| CHIARADONNA_NEOPLASTIC_TRANSFORMATION_KRAS_CDC25_UP                                                      | 43  | 0.461 | 0.002 | 0.229 |
| WU_HBX_TARGETS_2_UP                                                                                      | 22  | 0.460 | 0.050 | 0.229 |
| CHANG_IMMORTALIZED_BY_HPV31_DN                                                                           | 44  | 0.461 | 0.004 | 0.229 |
| REACTOME_EXTRACELLULAR_MATRIX_ORGANIZATION                                                               | 30  | 0.460 | 0.016 | 0.229 |
| BROWNE_HCMV_INFECTION_30MIN_UP                                                                           | 33  | 0.459 | 0.010 | 0.230 |
| LEE_LIVER_CANCER_E2F1_UP                                                                                 | 37  | 0.459 | 0.014 | 0.232 |
| BEGUM_TARGETS_OF_PAX3_FOXO1_FUSION_DN                                                                    | 25  | 0.456 | 0.038 | 0.234 |
| NAKAYAMA_SOFT_TISSUE_TUMORS_PCA1_UP                                                                      | 51  | 0.457 | 0.000 | 0.234 |
| DORSAM_HOXA9_TARGETS_DN                                                                                  | 28  | 0.457 | 0.025 | 0.234 |
| HUNSBERGER_EXERCISE_REGULATED_GENES                                                                      | 17  | 0.457 | 0.092 | 0.235 |
| REACTOME_CTNNB1_PHOSPHORYLATION_CASCADE                                                                  | 15  | 0.457 | 0.148 | 0.235 |
| WIKMAN_ASBESTOS_LUNG_CANCER_DN                                                                           | 25  | 0.457 | 0.037 | 0.235 |
| TAKEDA_TARGETS_OF_NUP98_HOXA9_FUSION_3D_DN                                                               | 20  | 0.458 | 0.077 | 0.235 |
| BURTON_ADIPOGENESIS_PEAK_AT_OHR                                                                          | 43  | 0.455 | 0.006 | 0.239 |
| LANDIS_ERBB2_BREAST_PRENEOPLASTIC_DN                                                                     | 43  | 0.454 | 0.004 | 0.240 |
| TONKS_TARGETS_OF_RUNX1_RUNX1T1_FUSION_SUSTAINED_IN_ERYTHROCYTE_UP                                        | 31  | 0.453 | 0.019 | 0.243 |

|                                                   |     |        |       |       |
|---------------------------------------------------|-----|--------|-------|-------|
| CASTELLANO_NRAS_TARGETS_UP                        | 43  | 0.453  | 0.006 | 0.243 |
| DIRMEIER_LMP1_RESPONSE_EARLY                      | 59  | 0.453  | 0.000 | 0.244 |
| JISON_SICKLE_CELL_DISEASE_UP                      | 168 | 0.451  | 0.000 | 0.246 |
| MARCHINI_TRABECTEDIN_RESISTANCE_DN                | 35  | 0.452  | 0.010 | 0.246 |
| PID_IL8_CXCR2_PATHWAY                             | 31  | 0.452  | 0.011 | 0.247 |
| SEITZ_NEOPLASTIC_TRANSFORMATION_BY_8P_DELETION_DN | 16  | 0.451  | 0.136 | 0.247 |
| MYLLYKANGAS_AMPLIFICATION_HOT_SPOT_23             | 17  | -0.665 | 0.000 | 0.148 |
| HUTTMANN_B_CLL_POOR_SURVIVAL_DN                   | 52  | -0.610 | 0.000 | 0.191 |
| REACTOME_DOUBLE_STRAND_BREAK_REPAIR               | 21  | -0.588 | 0.002 | 0.201 |
| KEGG_ALANINE_ASPARTATE_AND_Glutamate_METABOLISM   | 18  | -0.592 | 0.004 | 0.204 |
| CHEOK_RESPONSE_TO_MERCAPTOPYRINE_AND_HD_MTX_DN    | 20  | -0.601 | 0.002 | 0.212 |
| IVANOVA_HEMATOPOIESIS_STEM_CELL_SHORT_TERM        | 18  | -0.582 | 0.006 | 0.215 |
| REACTOME_SIGNALING_BY_FGFR1_FUSION_MUTANTS        | 18  | -0.613 | 0.002 | 0.220 |
| REACTOME_SIGNALING_BY_FGFR1_MUTANTS               | 19  | -0.594 | 0.000 | 0.221 |

**Supplemental Table 8. 35 leading edge genes among the gene set of 72 genes on Affymetrix Exon-array data**

| NAME   | PROBE        | GENE SYMBOL | GENE_TITLE                                                     | RANK IN GENE LIST | RANK METRIC SCORE |
|--------|--------------|-------------|----------------------------------------------------------------|-------------------|-------------------|
| row_31 | TIPARP       | TIPARP      | TCDD-inducible poly(ADP-ribose) polymerase                     | 13751             | -0.884            |
| row_32 | TCF4         | TCF4        | transcription factor 4                                         | 13774             | -0.891            |
| row_33 | RAD52        | RAD52       | RAD52 homolog (S. cerevisiae)                                  | 13776             | -0.891            |
| row_34 | SH3PXD2A     | SH3PXD2A    | SH3 and PX domains 2A                                          | 13930             | -0.936            |
| row_35 | ARHGAP27     | ARHGAP27    | Rho GTPase activating protein 27                               | 14102             | -0.973            |
| row_36 | MECP2        | MECP2       | methyl CpG binding protein 2 (Rett syndrome)                   | 14147             | -0.984            |
| row_37 | RAB30        | RAB30       | RAB30, member RAS oncogene family                              | 14155             | -0.985            |
| row_38 | RARS         | RARS        | arginyl-tRNA synthetase                                        | 14509             | -1.07             |
| row_39 | ADAM28       | ADAM28      | ADAM metallopeptidase domain 28                                | 14546             | -1.08             |
| row_40 | S100PBP      | S100PBP     | S100P binding protein                                          | 14620             | -1.1              |
| row_41 | <b>FOXP1</b> | FOXP1       | forkhead box P1                                                | 14742             | -1.13             |
| row_42 | FBXO11       | FBXO11      | F-box protein 11                                               | 14832             | -1.16             |
| row_43 | FCER2        | FCER2       | Fc fragment of IgE, low affinity II, receptor for (CD23)       | 15121             | -1.25             |
| row_44 | DDX6         | DDX6        | DEAD (Asp-Glu-Ala-Asp) box polypeptide 6                       | 15456             | -1.37             |
| row_45 | HNRNPR       | null        | null                                                           | 15496             | -1.38             |
| row_46 | DDX24        | DDX24       | DEAD (Asp-Glu-Ala-Asp) box polypeptide 24                      | 15607             | -1.43             |
| row_47 | ATP6V0D1     | ATP6V0D1    | ATPase, H+ transporting, lysosomal 38kDa, V0 subunit d1        | 15612             | -1.43             |
| row_48 | UQCRC1       | UQCRC1      | ubiquinol-cytochrome c reductase core protein I                | 15708             | -1.47             |
| row_49 | TCF20        | TCF20       | transcription factor 20 (AR1)                                  | 15717             | -1.47             |
| row_50 | CBLB         | CBLB        | Cas-Br-M (murine) ecotropic retroviral transforming sequence b | 15744             | -1.48             |
| row_51 | PRKX         | PRKX        | protein kinase, X-linked                                       | 15779             | -1.5              |
| row_52 | CCDC141      | null        | null                                                           | 16235             | -1.7              |
| row_53 | <b>IRF4</b>  | IRF4        | interferon regulatory factor 4                                 | 16277             | -1.72             |
| row_54 | REST         | REST        | RE1-silencing transcription factor                             | 16373             | -1.78             |
| row_55 | PAX5         | PAX5        | paired box gene 5 (B-cell lineage specific activator)          | 16568             | -1.91             |
| row_56 | VPS13D       | VPS13D      | vacuolar protein sorting 13 homolog D (S. cerevisiae)          | 16642             | -1.95             |

|        |       |       |                                                                     |       |       |
|--------|-------|-------|---------------------------------------------------------------------|-------|-------|
| row_57 | BACH2 | BACH2 | BTB and CNC homology 1, basic leucine zipper transcription factor 2 | 16791 | -2.07 |
| row_58 | BLK   | BLK   | B lymphoid tyrosine kinase                                          | 16841 | -2.11 |
| row_59 | PRKDC | PRKDC | protein kinase, DNA-activated, catalytic polypeptide                | 16869 | -2.14 |
| row_60 | ITCH  | ITCH  | itchy homolog E3 ubiquitin protein ligase (mouse)                   | 16948 | -2.22 |
| row_61 | SKIL  | SKIL  | SKI-like                                                            | 16980 | -2.25 |
| row_62 | AFF3  | AFF3  | AF4/FMR2 family, member 3                                           | 17041 | -2.33 |
| row_63 | UGGT1 | null  | null                                                                | 17059 | -2.35 |
| row_64 | FCRL2 | FCRL2 | Fc receptor-like 2                                                  | 17145 | -2.5  |
| row_65 | STRBP | STRBP | spermatid perinuclear RNA binding protein                           | 17157 | -2.53 |
